# Supplementary material
Source: PubMed Central journal article supplement (PMC2777776)
Supplement: 90800.2008_1.pdf [file 90800.2008_1.pdf]

**On-Line Attachment**

**Parameter Estimates for the 24 Subjects: GnRH and Free Te on LH Secretion**

| Basal       | eta0    | eta1    | Potency<br>Coef | Eff     | TeFdbk  | beta1   | beta2   | beta3   | SD Resid | SD RE   |
|-------------|---------|---------|-----------------|---------|---------|---------|---------|---------|----------|---------|
| 0.1003      | -1.3428 | 0.0038  | -3.4969         | 6.9255  | 0.0638  | 10.3724 | 0.0005  | 0.2383  | 0.0811   | 14.9686 |
| 0.0312      | 4.4356  | -1.3874 | -5.1563         | 5.0361  | 0.0370  | 9.1119  | 0.0033  | 0.2853  | 0.0386   | 19.5219 |
| 0.2154      | 1.4641  | 0.0016  | -3.8012         | 7.4669  | 0.0590  | 12.9337 | 0.0000  | 0.1692  | 0.1002   | 11.5305 |
| 0.0299      | -2.4003 | 1.0582  | -4.0004         | 4.1762  | 0.0741  | 6.5007  | 0.0311  | 0.3510  | 0.0466   | 14.3453 |
| 0.0750      | 0.0037  | 0.5893  | -4.8827         | 15.0978 | 0.0879  | 14.1831 | 0.0001  | 0.2310  | 0.0451   | 15.4536 |
| 0.0239      | -0.3285 | 2.3962  | -5.6031         | 23.8869 | 0.0602  | 13.6710 | 0.0000  | 0.2085  | 0.0608   | 9.8637  |
| 0.0889      | 0.0434  | 0.3394  | -10.4602        | 5.8860  | 0.0517  | 9.8791  | 0.0002  | 0.1929  | 0.1024   | 93.5098 |
| 0.1930      | 8.4415  | 0.7161  | -8.2576         | 12.4042 | 0.0755  | 14.1689 | 0.0005  | 0.3061  | 0.0837   | 9.3669  |
| 0.0000      | 0.0208  | 0.5728  | -5.3581         | 28.7783 | 0.0704  | 12.0794 | 0.0001  | 0.2397  | 0.0319   | 6.6892  |
| 0.1008      | 0.1250  | 0.5213  | -3.6972         | 6.6931  | 0.0693  | 4.9042  | 0.0856  | 0.3894  | 0.0714   | 8.5949  |
| 0.0075      | -0.0031 | 0.2295  | -2.7867         | 1.8360  | 0.0307  | 23.9960 | 0.0000  | 0.2122  | 0.0232   | 6.5030  |
| 0.0692      | -0.6399 | 0.4095  | -5.3707         | 27.7629 | 0.0991  | 9.1565  | 0.0021  | 0.2747  | 0.0614   | 15.5325 |
| 0.0130      | 0.0004  | 0.3325  | -3.0610         | 3.7131  | 0.0633  | 12.1303 | 0.0001  | 0.2425  | 0.0446   | 7.1757  |
| 0.0595      | -3.6323 | 0.9472  | -4.8564         | 11.8682 | 0.0869  | 13.6945 | 0.0000  | 0.2120  | 0.0454   | 16.1403 |
| 0.0457      | -2.0388 | 0.5899  | -3.8134         | 10.7289 | 0.0519  | 9.2440  | 0.0008  | 0.2426  | 0.0541   | 8.7747  |
| 0.0290      | -1.0553 | 0.4722  | -5.7606         | 26.7685 | 0.0412  | 7.5408  | 0.0104  | 0.3162  | 0.0365   | 8.5280  |
| 0.0338      | 4.6374  | 2.2505  | -6.3065         | 8.8341  | 0.0623  | 10.2029 | 0.0001  | 0.2081  | 0.0694   | 11.5448 |
| 0.2112      | -0.5479 | -0.0967 | -4.5138         | 15.1788 | 0.0821  | 10.4690 | 0.0003  | 0.2358  | 0.0935   | 17.6862 |
| 0.0464      | 1.5044  | 0.1490  | -4.6277         | 12.7079 | 0.1006  | 13.5103 | 0.0000  | 0.2287  | 0.0840   | 9.3103  |
| 0.0610      | -0.9851 | -0.2054 | -4.3506         | 3.5427  | 0.0360  | 6.6388  | 0.0160  | 0.3072  | 0.0268   | 15.5850 |
| 0.1308      | -8.8173 | 2.3410  | -6.9763         | 9.2667  | 0.1019  | 24.6712 | 0.0000  | 0.1751  | 0.0694   | 22.8695 |
| 0.0000      | 2.4051  | 0.0010  | -5.0105         | 26.2404 | 0.0661  | 7.4186  | 0.0070  | 0.2991  | 0.0810   | 9.4089  |
| 0.0132      | 0.1406  | 0.1029  | -3.4429         | 5.6734  | 0.0741  | 10.7702 | 0.0007  | 0.2657  | 0.0514   | 10.4807 |
| 0.0316      | -0.0929 | 0.4591  | -5.1178         | 20.3331 | 0.0870  | 12.7727 | 0.0000  | 0.2075  | 0.0576   | 13.2217 |
| Sample Mean |         |         |                 |         |         |         |         |         |          |         |
| 0.0671      | 0.0557  | 0.5331  | -5.0295         | 12.5336 | 0.0680  | 11.6675 | 0.0066  | 0.2516  | 0.0608   | 15.6919 |
| Sample SD   |         |         |                 |         |         |         |         |         |          |         |
| 0.0641      | 3.1496  | 0.8388  | 1.7065          | 8.5957  | 0.0203  | 4.7051  | 0.0183  | 0.0551  | 0.0229   | 17.1159 |
| Sample SEM  |         |         |                 |         |         |         |         |         |          |         |
| 0.0131      | 0.6429  | 0.1712  | 0.3483          | 1.7546  | 0.0041  | 0.9604  | 0.0037  | 0.0112  | 0.0047   | 3.4938  |
| Sample CORR |         |         |                 |         |         |         |         |         |          |         |
| 1.0000      | 0.0657  | -0.0348 | -0.2277         | -0.1787 | 0.2385  | 0.1158  | 0.0281  | -0.1456 | 0.6599   | 0.1624  |
| 0.0657      | 1.0000  | -0.3162 | -0.1729         | 0.0215  | -0.2577 | -0.2811 | -0.0508 | 0.2228  | 0.1925   | -0.0989 |
| -0.0348     | -0.3162 | 1.0000  | -0.2897         | 0.1722  | 0.3289  | 0.3496  | -0.0224 | -0.2798 | 0.0595   | -0.0460 |
| -0.2277     | -0.1729 | -0.2897 | 1.0000          | -0.2056 | -0.1092 | -0.0661 | 0.2073  | 0.1855  | -0.3996  | -0.7031 |
| -0.1787     | 0.0215  | 0.1722  | -0.2056         | 1.0000  | 0.3048  | -0.1268 | -0.1830 | 0.0131  | 0.0010   | -0.1985 |
| 0.2385      | -0.2577 | 0.3289  | -0.1092         | 0.3048  | 1.0000  | 0.2007  | -0.0639 | -0.1649 | 0.3409   | -0.0852 |
| 0.1158      | -0.2811 | 0.3496  | -0.0661         | -0.1268 | 0.2007  | 1.0000  | -0.4598 | -0.6526 | -0.0728  | -0.0460 |
| 0.0281      | -0.0508 | -0.0224 | 0.2073          | -0.1830 | -0.0639 | -0.4598 | 1.0000  | 0.7316  | -0.0259  | -0.1051 |

-0.1456 0.2228 -0.2798 0.1855 0.0131 -0.1649 -0.6526 0.7316 1.0000 -0.2413 -0.2620  
 0.6599 0.1925 0.0595 -0.3996 0.0010 0.3409 -0.0728 -0.0259 -0.2413 1.0000 0.4003  
 0.1624 -0.0989 -0.0460 -0.7031 -0.1985 -0.0852 -0.0460 -0.1051 -0.2620 0.4003 1.0000

**Parameter Estimates for the 24 Subjects: LH on Te:**

| Fast   | slow   | basal  | Pot     | Sens   | Eff    | sd RE  | sd Error |
|--------|--------|--------|---------|--------|--------|--------|----------|
| 0.7645 | 0.2276 | 0.0000 | -3.1201 | 1.3393 | 4.6159 | 0.6774 | 76.9945  |
| 1.0133 | 0.2756 | 0.0000 | -1.4960 | 1.6114 | 4.3099 | 1.3694 | 43.9822  |
| 0.9504 | 0.1980 | 0.6519 | -6.5170 | 2.9635 | 2.9628 | 1.0182 | 80.9020  |
| 0.9872 | 0.1543 | 0.0000 | -1.1908 | 1.8135 | 3.8262 | 1.6425 | 121.0804 |
| 1.1969 | 0.1064 | 0.0000 | -5.5738 | 4.0235 | 2.8616 | 2.1428 | 94.3381  |
| 0.7482 | 0.1248 | 0.0000 | -1.9799 | 1.3707 | 3.1637 | 1.1830 | 47.3581  |
| 1.0583 | 0.2642 | 0.0000 | -2.2944 | 1.2564 | 6.0033 | 2.0189 | 71.7690  |
| 0.5710 | 0.0954 | 0.0000 | -4.3118 | 1.8835 | 2.8834 | 1.4793 | 57.7664  |
| 0.6366 | 0.0809 | 0.0000 | -4.3773 | 3.5564 | 1.5888 | 1.0574 | 29.8051  |
| 0.4943 | 0.1815 | 0.0171 | -2.8359 | 1.5683 | 2.0354 | 0.4394 | 36.2906  |
| 0.7661 | 0.1912 | 0.0000 | -1.4794 | 2.7734 | 1.9162 | 0.4192 | 22.9671  |
| 0.7317 | 0.0753 | 0.0000 | -5.3952 | 3.9351 | 2.2518 | 0.7835 | 41.8905  |
| 0.8292 | 0.1436 | 0.1221 | -5.0047 | 3.5786 | 2.4212 | 0.9066 | 63.1354  |
| 1.5105 | 0.2475 | 0.0000 | -2.6603 | 1.8751 | 9.6483 | 2.0225 | 52.2829  |
| 0.8872 | 0.1189 | 0.0000 | -3.9561 | 1.6750 | 3.2229 | 0.1594 | 31.1054  |
| 1.0604 | 0.1212 | 0.0000 | -2.3933 | 2.5933 | 2.1968 | 0.6878 | 14.5256  |
| 0.7839 | 0.1593 | 0.0000 | -2.0537 | 1.0497 | 2.1243 | 1.6831 | 34.6099  |
| 0.7813 | 0.1237 | 0.0000 | -4.3598 | 2.1190 | 3.1183 | 1.1579 | 34.4985  |
| 0.5435 | 0.0942 | 0.0000 | -2.4467 | 0.6351 | 2.7798 | 6.3977 | 20.8543  |
| 0.7654 | 0.3125 | 0.0000 | -2.2174 | 1.8973 | 3.9343 | 1.7362 | 27.9210  |
| 0.3954 | 0.1037 | 0.0000 | -3.6570 | 0.8454 | 7.8345 | 1.8745 | 24.3684  |
| 0.6683 | 0.2900 | 0.0000 | -1.3838 | 0.8750 | 4.2515 | 1.5084 | 61.1344  |
| 0.6362 | 0.4140 | 0.0000 | -1.4989 | 1.3308 | 4.8206 | 4.5540 | 95.8391  |
| 0.8284 | 0.2915 | 0.0000 | -2.6765 | 2.1797 | 7.4840 | 2.6486 | 82.0063  |

Sample Mean =

0.8170 0.1831 0.0330 -3.1200 2.0312 3.8440 1.6487 52.8094

Sample SD =

0.2432 0.0891 0.1342 1.5023 0.9862 2.0530 1.3556 27.9721

Sample Stand Err of Mean

0.0496 0.0182 0.0274 0.3067 0.2013 0.4191 0.2767 5.7098

Sample CORR =

1.0000 0.1583 0.1104 -0.0245 0.2915 0.3170 -0.1409 0.3024  
 0.1583 1.0000 0.0176 0.5174 -0.3471 0.4606 0.2427 0.3660  
 0.1104 0.0176 1.0000 -0.5262 0.2592 -0.1230 -0.1248 0.2235  
 -0.0245 0.5174 -0.5262 1.0000 -0.6595 0.2245 0.2481 -0.0351  
 0.2915 -0.3471 0.2592 -0.6595 1.0000 -0.3803 -0.3771 0.1003  
 0.3170 0.4606 -0.1230 0.2245 -0.3803 1.0000 0.2506 0.2405  
 -0.1409 0.2427 -0.1248 0.2481 -0.3771 0.2506 1.0000 0.1515  
 0.3024 0.3660 0.2235 -0.0351 0.1003 0.2405 0.1515 1.0000

**Parameter Estimates: Te Half-Lives**

FrTe-fast -Slow Half Lives of Total Te for the 4 GRX Levels

|        |        |         |         |         |         |
|--------|--------|---------|---------|---------|---------|
| 0.9067 | 3.0454 | 63.0000 | 66.0000 | 65.0000 | 65.0000 |
| 0.6840 | 2.5148 | 29.0000 | 34.0000 | 29.0000 | 31.0000 |
| 0.7294 | 3.5004 | 60.0000 | 48.0000 | 51.0000 | 56.0000 |
| 0.7021 | 4.4913 | 49.0000 | 46.0000 | 50.0000 | 47.0000 |
| 0.5791 | 6.5147 | 45.0000 | 44.0000 | 38.0000 | 45.0000 |
| 0.9264 | 5.5553 | 43.0000 | 46.0000 | 46.0000 | 41.0000 |
| 0.6549 | 2.6236 | 41.0000 | 35.0000 | 36.0000 | 38.0000 |
| 1.2139 | 7.2650 | 63.0000 | 64.0000 | 64.0000 | 64.0000 |
| 1.0888 | 8.5710 | 70.0000 | 66.0000 | 66.0000 | 59.0000 |
| 1.4024 | 3.8188 | 75.0000 | 68.0000 | 69.0000 | 75.0000 |
| 0.9047 | 3.6256 | 49.0000 | 50.0000 | 50.0000 | 43.0000 |
| 0.9473 | 9.2085 | 45.0000 | 45.0000 | 44.0000 | 49.0000 |
| 0.8359 | 4.8260 | 70.0000 | 78.0000 | 66.0000 | 70.0000 |
| 0.4589 | 2.8008 | 25.0000 | 22.0000 | 22.0000 | 23.0000 |
| 0.7813 | 5.8283 | 49.0000 | 55.0000 | 58.0000 | 59.0000 |
| 0.6537 | 5.7196 | 33.0000 | 35.0000 | 33.0000 | 31.0000 |
| 0.8843 | 4.3510 | 55.0000 | 68.0000 | 66.0000 | 51.0000 |
| 0.8872 | 5.6048 | 45.0000 | 46.0000 | 48.0000 | 44.0000 |
| 1.2754 | 7.3550 | 59.0000 | 66.0000 | 69.0000 | 62.0000 |
| 0.9057 | 2.2180 | 50.0000 | 47.0000 | 51.0000 | 37.0000 |
| 1.7531 | 6.6871 | 87.0000 | 89.0000 | 80.0000 | 83.0000 |
| 1.0372 | 2.3900 | 56.0000 | 58.0000 | 56.0000 | 54.0000 |
| 1.0895 | 1.6741 | 69.0000 | 72.0000 | 67.0000 | 71.0000 |
| 0.8368 | 2.3779 | 48.0000 | 47.0000 | 47.0000 | 50.0000 |

Sample Mean

|        |        |         |         |         |         |
|--------|--------|---------|---------|---------|---------|
| 0.9224 | 4.6903 | 53.2500 | 53.9583 | 52.9583 | 52.0000 |
|--------|--------|---------|---------|---------|---------|

Sample SD

|        |        |         |         |         |         |
|--------|--------|---------|---------|---------|---------|
| 0.2841 | 2.1373 | 14.8155 | 15.7907 | 14.6123 | 15.0420 |
|--------|--------|---------|---------|---------|---------|

Sample SEM

|        |        |        |        |        |        |
|--------|--------|--------|--------|--------|--------|
| 0.0580 | 0.4363 | 3.0242 | 3.2233 | 2.9827 | 3.0704 |
|--------|--------|--------|--------|--------|--------|

**GnRH and Te on LH Secretion – For EACH INDIVIDUAL - based on the parameter est for that INDIVIDUAL’S parameter - Est of Asymptotic Covariance Matrix (based on Observed Information Matrix)**

| Basal   | eta0    | eta1    | ED50    | Eff     | TeFdbk  | beta1   | beta2   | beta3   | SD Error | SD RE   |
|---------|---------|---------|---------|---------|---------|---------|---------|---------|----------|---------|
| jj=1    |         |         |         |         |         |         |         |         |          |         |
| theta = |         |         |         |         |         |         |         |         |          |         |
| 0.1003  | -1.3428 | 0.0038  | -3.4969 | 6.9255  | 0.0638  | 10.3724 | 0.0005  | 0.2383  | 0.0811   | 14.9686 |
| SE =    |         |         |         |         |         |         |         |         |          |         |
| 0.0076  | 0.2462  | 0.0507  | 0.0754  | 0.6586  | 0.0058  | 0.1304  | 0.0001  | 0.0022  | 0.0525   | 0.7136  |
| CORR =  |         |         |         |         |         |         |         |         |          |         |
| 1.0000  | -0.0305 | -0.0540 | -0.1957 | -0.2620 | -0.4036 | 0.1352  | -0.0678 | 0.1423  | 0        | 0       |
| -0.0305 | 1.0000  | -0.7567 | -0.2601 | 0.1343  | -0.0298 | 0.1259  | 0.4197  | 0.3057  | 0        | 0       |
| -0.0540 | -0.7567 | 1.0000  | -0.1009 | 0.0734  | 0.2656  | 0.2195  | -0.2208 | 0.0195  | 0        | 0       |
| -0.1957 | -0.2601 | -0.1009 | 1.0000  | -0.7346 | -0.4060 | -0.7184 | -0.6501 | -0.7157 | 0        | 0       |
| -0.2620 | 0.1343  | 0.0734  | -0.7346 | 1.0000  | 0.8509  | 0.3723  | 0.5852  | 0.3592  | 0        | 0       |
| -0.4036 | -0.0298 | 0.2656  | -0.4060 | 0.8509  | 1.0000  | 0.1380  | 0.1913  | 0.0191  | 0        | 0       |
| 0.1352  | 0.1259  | 0.2195  | -0.7184 | 0.3723  | 0.1380  | 1.0000  | 0.5204  | 0.8988  | 0        | 0       |
| -0.0678 | 0.4197  | -0.2208 | -0.6501 | 0.5852  | 0.1913  | 0.5204  | 1.0000  | 0.7906  | 0        | 0       |
| 0.1423  | 0.3057  | 0.0195  | -0.7157 | 0.3592  | 0.0191  | 0.8988  | 0.7906  | 1.0000  | 0        | 0       |
| 0       | 0       | 0       | 0       | 0       | 0       | 0       | 0       | 0       | 1.0000   | 0       |
| 0       | 0       | 0       | 0       | 0       | 0       | 0       | 0       | 0       | 0        | 1.0000  |
| jj= 2   |         |         |         |         |         |         |         |         |          |         |
| theta = |         |         |         |         |         |         |         |         |          |         |
| 0.0312  | 4.4356  | -1.3874 | -5.1563 | 5.0361  | 0.0370  | 9.1119  | 0.0033  | 0.2853  | 0.0386   | 19.5219 |
| SE =    |         |         |         |         |         |         |         |         |          |         |
| 0.0025  | 0.1754  | 0.0252  | 0.0854  | 0.4674  | 0.0040  | 0.0617  | 0.0004  | 0.0021  | 0.0362   | 0.8150  |
| CORR =  |         |         |         |         |         |         |         |         |          |         |
| 1.0000  | 0.0106  | 0.0765  | -0.0494 | -0.2024 | -0.1942 | 0.3148  | -0.1705 | 0.0225  | 0        | 0       |
| 0.0106  | 1.0000  | -0.6497 | -0.3809 | 0.0275  | -0.5343 | 0.1002  | 0.1742  | 0.2760  | 0        | 0       |
| 0.0765  | -0.6497 | 1.0000  | 0.3562  | -0.2413 | 0.4801  | 0.2452  | -0.2959 | -0.1940 | 0        | 0       |
| -0.0494 | -0.3809 | 0.3562  | 1.0000  | -0.8218 | 0.0072  | 0.2929  | -0.8063 | -0.7947 | 0        | 0       |
| -0.2024 | 0.0275  | -0.2413 | -0.8218 | 1.0000  | 0.4535  | -0.5934 | 0.7922  | 0.5517  | 0        | 0       |
| -0.1942 | -0.5343 | 0.4801  | 0.0072  | 0.4535  | 1.0000  | -0.2841 | 0.0344  | -0.1896 | 0        | 0       |
| 0.3148  | 0.1002  | 0.2452  | 0.2929  | -0.5934 | -0.2841 | 1.0000  | -0.6426 | -0.2077 | 0        | 0       |
| -0.1705 | 0.1742  | -0.2959 | -0.8063 | 0.7922  | 0.0344  | -0.6426 | 1.0000  | 0.8680  | 0        | 0       |
| 0.0225  | 0.2760  | -0.1940 | -0.7947 | 0.5517  | -0.1896 | -0.2077 | 0.8680  | 1.0000  | 0        | 0       |
| 0       | 0       | 0       | 0       | 0       | 0       | 0       | 0       | 0       | 1.0000   | 0       |
| 0       | 0       | 0       | 0       | 0       | 0       | 0       | 0       | 0       | 0        | 1.0000  |
| jj= 3   |         |         |         |         |         |         |         |         |          |         |
| theta = |         |         |         |         |         |         |         |         |          |         |
| 0.2154  | 1.4641  | 0.0016  | -3.8012 | 7.4669  | 0.0590  | 12.9337 | 0.0000  | 0.1692  | 0.1002   | 11.5305 |
| SE =    |         |         |         |         |         |         |         |         |          |         |
| 0.0091  | 0.3015  | 0.0604  | 0.1307  | 2.6158  | 0.0097  | 0.4097  | 0.0004  | 0.0025  | 0.0584   | 0.6263  |

CORR =

|         |         |         |         |         |         |         |         |         |        |        |
|---------|---------|---------|---------|---------|---------|---------|---------|---------|--------|--------|
| 1.0000  | -0.1416 | -0.0578 | -0.1645 | -0.2816 | -0.0068 | -0.0256 | -0.3325 | -0.0589 | 0      | 0      |
| -0.1416 | 1.0000  | -0.4497 | -0.0632 | 0.2655  | -0.2760 | 0.0075  | 0.4236  | 0.1339  | 0      | 0      |
| -0.0578 | -0.4497 | 1.0000  | -0.4527 | 0.3735  | 0.2300  | 0.5681  | 0.2950  | 0.5246  | 0      | 0      |
| -0.1645 | -0.0632 | -0.4527 | 1.0000  | -0.7644 | -0.0878 | -0.6987 | -0.6046 | -0.6869 | 0      | 0      |
| -0.2816 | 0.2655  | 0.3735  | -0.7644 | 1.0000  | 0.0541  | 0.5846  | 0.9320  | 0.6539  | 0      | 0      |
| -0.0068 | -0.2760 | 0.2300  | -0.0878 | 0.0541  | 1.0000  | -0.1315 | -0.2468 | -0.2288 | 0      | 0      |
| -0.0256 | 0.0075  | 0.5681  | -0.6987 | 0.5846  | -0.1315 | 1.0000  | 0.5811  | 0.9774  | 0      | 0      |
| -0.3325 | 0.4236  | 0.2950  | -0.6046 | 0.9320  | -0.2468 | 0.5811  | 1.0000  | 0.6988  | 0      | 0      |
| -0.0589 | 0.1339  | 0.5246  | -0.6869 | 0.6539  | -0.2288 | 0.9774  | 0.6988  | 1.0000  | 0      | 0      |
| 0       | 0       | 0       | 0       | 0       | 0       | 0       | 0       | 0       | 1.0000 | 0      |
| 0       | 0       | 0       | 0       | 0       | 0       | 0       | 0       | 0       | 0      | 1.0000 |

jj= 4

theta =

|        |         |        |         |        |        |        |        |        |        |         |
|--------|---------|--------|---------|--------|--------|--------|--------|--------|--------|---------|
| 0.0299 | -2.4003 | 1.0582 | -4.0004 | 4.1762 | 0.0741 | 6.5007 | 0.0311 | 0.3510 | 0.0466 | 14.3453 |
|--------|---------|--------|---------|--------|--------|--------|--------|--------|--------|---------|

SE =

|        |        |        |        |        |        |        |        |        |        |        |
|--------|--------|--------|--------|--------|--------|--------|--------|--------|--------|--------|
| 0.0041 | 0.1984 | 0.0468 | 0.0769 | 0.2942 | 0.0041 | 0.8684 | 0.0263 | 0.0287 | 0.0398 | 0.6986 |
|--------|--------|--------|--------|--------|--------|--------|--------|--------|--------|--------|

CORR =

|         |         |         |         |         |         |         |         |         |        |        |
|---------|---------|---------|---------|---------|---------|---------|---------|---------|--------|--------|
| 1.0000  | -0.1263 | 0.2554  | -0.4423 | -0.0061 | -0.1324 | -0.1750 | 0.1876  | 0.2090  | 0      | 0      |
| -0.1263 | 1.0000  | -0.6466 | -0.0569 | 0.1431  | 0.2733  | 0.0284  | -0.0301 | -0.0236 | 0      | 0      |
| 0.2554  | -0.6466 | 1.0000  | -0.3402 | -0.1979 | -0.2569 | 0.1093  | -0.0752 | -0.0411 | 0      | 0      |
| -0.4423 | -0.0569 | -0.3402 | 1.0000  | -0.5904 | -0.2161 | 0.6306  | -0.6632 | -0.6930 | 0      | 0      |
| -0.0061 | 0.1431  | -0.1979 | -0.5904 | 1.0000  | 0.8146  | -0.5532 | 0.5614  | 0.5550  | 0      | 0      |
| -0.1324 | 0.2733  | -0.2569 | -0.2161 | 0.8146  | 1.0000  | -0.0546 | 0.0641  | 0.0658  | 0      | 0      |
| -0.1750 | 0.0284  | 0.1093  | 0.6306  | -0.5532 | -0.0546 | 1.0000  | -0.9980 | -0.9914 | 0      | 0      |
| 0.1876  | -0.0301 | -0.0752 | -0.6632 | 0.5614  | 0.0641  | -0.9980 | 1.0000  | 0.9973  | 0      | 0      |
| 0.2090  | -0.0236 | -0.0411 | -0.6930 | 0.5550  | 0.0658  | -0.9914 | 0.9973  | 1.0000  | 0      | 0      |
| 0       | 0       | 0       | 0       | 0       | 0       | 0       | 0       | 0       | 1.0000 | 0      |
| 0       | 0       | 0       | 0       | 0       | 0       | 0       | 0       | 0       | 0      | 1.0000 |

jj = 5

theta =

|        |        |        |         |         |        |         |        |        |        |         |
|--------|--------|--------|---------|---------|--------|---------|--------|--------|--------|---------|
| 0.0750 | 0.0037 | 0.5893 | -4.8827 | 15.0978 | 0.0879 | 14.1831 | 0.0001 | 0.2310 | 0.0451 | 15.4536 |
|--------|--------|--------|---------|---------|--------|---------|--------|--------|--------|---------|

SE =

|        |        |        |        |        |        |        |        |        |        |        |
|--------|--------|--------|--------|--------|--------|--------|--------|--------|--------|--------|
| 0.0037 | 0.0960 | 0.0176 | 0.0586 | 1.6303 | 0.0026 | 0.0777 | 0.0001 | 0.0006 | 0.0392 | 0.7251 |
|--------|--------|--------|--------|--------|--------|--------|--------|--------|--------|--------|

CORR =

|         |         |         |         |         |         |         |         |         |        |   |
|---------|---------|---------|---------|---------|---------|---------|---------|---------|--------|---|
| 1.0000  | 0.1114  | 0.0826  | -0.1607 | -0.3817 | -0.1601 | 0.0238  | -0.4700 | 0.0325  | 0      | 0 |
| 0.1114  | 1.0000  | -0.4050 | -0.1808 | -0.0460 | -0.2284 | 0.2035  | 0.0658  | 0.2639  | 0      | 0 |
| 0.0826  | -0.4050 | 1.0000  | 0.0621  | -0.1851 | -0.2934 | 0.3508  | 0.0735  | 0.3574  | 0      | 0 |
| -0.1607 | -0.1808 | 0.0621  | 1.0000  | -0.6898 | -0.3777 | -0.4509 | -0.2972 | -0.3720 | 0      | 0 |
| -0.3817 | -0.0460 | -0.1851 | -0.6898 | 1.0000  | 0.5528  | 0.2835  | 0.7499  | 0.2380  | 0      | 0 |
| -0.1601 | -0.2284 | -0.2934 | -0.3777 | 0.5528  | 1.0000  | -0.1903 | -0.0213 | -0.3226 | 0      | 0 |
| 0.0238  | 0.2035  | 0.3508  | -0.4509 | 0.2835  | -0.1903 | 1.0000  | 0.4442  | 0.9690  | 0      | 0 |
| -0.4700 | 0.0658  | 0.0735  | -0.2972 | 0.7499  | -0.0213 | 0.4442  | 1.0000  | 0.5193  | 0      | 0 |
| 0.0325  | 0.2639  | 0.3574  | -0.3720 | 0.2380  | -0.3226 | 0.9690  | 0.5193  | 1.0000  | 0      | 0 |
| 0       | 0       | 0       | 0       | 0       | 0       | 0       | 0       | 0       | 1.0000 | 0 |

0 0 0 0 0 0 0 0 0 0 1.0000

jj=6

theta =

0.0239 -0.3285 2.3962 -5.6031 23.8869 0.0602 13.6710 0.0000 0.2085 0.0608 9.8637

SE =

0.0058 0.1096 0.0206 0.1076 4.9857 0.0038 0.1150 0.0002 0.0009 0.0455 0.5793

CORR =

|         |         |         |         |         |         |         |         |         |        |        |
|---------|---------|---------|---------|---------|---------|---------|---------|---------|--------|--------|
| 1.0000  | -0.2057 | 0.1301  | 0.0008  | -0.5148 | -0.2871 | 0.1490  | -0.4876 | 0.1565  | 0      | 0      |
| -0.2057 | 1.0000  | -0.2262 | -0.1580 | 0.2782  | 0.2177  | -0.0665 | 0.2532  | -0.0535 | 0      | 0      |
| 0.1301  | -0.2262 | 1.0000  | 0.2261  | -0.0179 | -0.1457 | 0.7028  | 0.3157  | 0.7134  | 0      | 0      |
| 0.0008  | -0.1580 | 0.2261  | 1.0000  | -0.6244 | -0.5233 | 0.0300  | -0.0382 | 0.1585  | 0      | 0      |
| -0.5148 | 0.2782  | -0.0179 | -0.6244 | 1.0000  | 0.4100  | 0.1474  | 0.7638  | 0.1109  | 0      | 0      |
| -0.2871 | 0.2177  | -0.1457 | -0.5233 | 0.4100  | 1.0000  | -0.3780 | -0.0730 | -0.4795 | 0      | 0      |
| 0.1490  | -0.0665 | 0.7028  | 0.0300  | 0.1474  | -0.3780 | 1.0000  | 0.4512  | 0.9774  | 0      | 0      |
| -0.4876 | 0.2532  | 0.3157  | -0.0382 | 0.7638  | -0.0730 | 0.4512  | 1.0000  | 0.5139  | 0      | 0      |
| 0.1565  | -0.0535 | 0.7134  | 0.1585  | 0.1109  | -0.4795 | 0.9774  | 0.5139  | 1.0000  | 0      | 0      |
| 0       | 0       | 0       | 0       | 0       | 0       | 0       | 0       | 0       | 1.0000 | 0      |
| 0       | 0       | 0       | 0       | 0       | 0       | 0       | 0       | 0       | 0      | 1.0000 |

jj=7

theta =

0.0889 0.0434 0.3394 -10.4602 5.8860 0.0517 9.8791 0.0002 0.1929 0.1024 93.5098

SE =

0.0073 0.9262 0.1557 0.2593 28.1982 0.0032 0.0732 0.0048 0.0012 0.0590 1.7836

CORR =

|         |         |         |         |         |         |         |         |         |        |        |
|---------|---------|---------|---------|---------|---------|---------|---------|---------|--------|--------|
| 1.0000  | -0.2302 | 0.3263  | -0.0631 | -0.4442 | -0.1371 | 0.0595  | -0.4438 | 0.0437  | 0      | 0      |
| -0.2302 | 1.0000  | -0.7039 | -0.2645 | 0.3355  | -0.0797 | 0.1212  | 0.3354  | 0.1663  | 0      | 0      |
| 0.3263  | -0.7039 | 1.0000  | -0.3969 | -0.1130 | -0.0747 | 0.3089  | -0.1121 | 0.4086  | 0      | 0      |
| -0.0631 | -0.2645 | -0.3969 | 1.0000  | -0.5479 | -0.0112 | -0.7265 | -0.5467 | -0.9314 | 0      | 0      |
| -0.4442 | 0.3355  | -0.1130 | -0.5479 | 1.0000  | 0.1871  | 0.1884  | 0.9999  | 0.4250  | 0      | 0      |
| -0.1371 | -0.0797 | -0.0747 | -0.0112 | 0.1871  | 1.0000  | 0.2371  | 0.1787  | 0.1200  | 0      | 0      |
| 0.0595  | 0.1212  | 0.3089  | -0.7265 | 0.1884  | 0.2371  | 1.0000  | 0.1833  | 0.9138  | 0      | 0      |
| -0.4438 | 0.3354  | -0.1121 | -0.5467 | 0.9999  | 0.1787  | 0.1833  | 1.0000  | 0.4222  | 0      | 0      |
| 0.0437  | 0.1663  | 0.4086  | -0.9314 | 0.4250  | 0.1200  | 0.9138  | 0.4222  | 1.0000  | 0      | 0      |
| 0       | 0       | 0       | 0       | 0       | 0       | 0       | 0       | 0       | 1.0000 | 0      |
| 0       | 0       | 0       | 0       | 0       | 0       | 0       | 0       | 0       | 0      | 1.0000 |

jj=8

theta =

0.1930 8.4415 0.7161 -8.2576 12.4042 0.0755 14.1689 0.0005 0.3061 0.0837 9.3669

SE =

0.0057 0.1539 0.0228 0.1147 2.8006 0.0021 0.1731 0.0002 0.0018 0.0534 0.5645

CORR =

|         |         |         |         |         |         |        |         |         |   |   |
|---------|---------|---------|---------|---------|---------|--------|---------|---------|---|---|
| 1.0000  | -0.0337 | 0.0446  | -0.0005 | -0.5643 | -0.0020 | 0.0109 | -0.5846 | -0.0088 | 0 | 0 |
| -0.0337 | 1.0000  | -0.1701 | -0.6324 | 0.2111  | -0.2374 | 0.3405 | 0.2204  | 0.3460  | 0 | 0 |

|         |         |         |         |         |         |         |         |         |        |        |
|---------|---------|---------|---------|---------|---------|---------|---------|---------|--------|--------|
| 0.0446  | -0.1701 | 1.0000  | 0.1602  | -0.2162 | 0.3590  | -0.4014 | -0.2436 | -0.4572 | 0      | 0      |
| -0.0005 | -0.6324 | 0.1602  | 1.0000  | -0.4732 | 0.1558  | -0.8498 | -0.4267 | -0.8450 | 0      | 0      |
| -0.5643 | 0.2111  | -0.2162 | -0.4732 | 1.0000  | 0.0490  | 0.3934  | 0.9898  | 0.4254  | 0      | 0      |
| -0.0020 | -0.2374 | 0.3590  | 0.1558  | 0.0490  | 1.0000  | -0.2602 | -0.0502 | -0.2988 | 0      | 0      |
| 0.0109  | 0.3405  | -0.4014 | -0.8498 | 0.3934  | -0.2602 | 1.0000  | 0.3631  | 0.9934  | 0      | 0      |
| -0.5846 | 0.2204  | -0.2436 | -0.4267 | 0.9898  | -0.0502 | 0.3631  | 1.0000  | 0.4043  | 0      | 0      |
| -0.0088 | 0.3460  | -0.4572 | -0.8450 | 0.4254  | -0.2988 | 0.9934  | 0.4043  | 1.0000  | 0      | 0      |
| 0       | 0       | 0       | 0       | 0       | 0       | 0       | 0       | 0       | 1.0000 | 0      |
| 0       | 0       | 0       | 0       | 0       | 0       | 0       | 0       | 0       | 0      | 1.0000 |

jj =9

theta =

|         |        |        |         |         |        |         |        |        |        |        |
|---------|--------|--------|---------|---------|--------|---------|--------|--------|--------|--------|
| -0.0087 | 0.0208 | 0.5728 | -5.3581 | 28.7783 | 0.0704 | 12.0794 | 0.0001 | 0.2397 | 0.0319 | 6.6892 |
|---------|--------|--------|---------|---------|--------|---------|--------|--------|--------|--------|

SE =

|        |        |        |        |        |        |        |        |        |        |        |
|--------|--------|--------|--------|--------|--------|--------|--------|--------|--------|--------|
| 0.0030 | 0.0745 | 0.0119 | 0.2561 | 7.6913 | 0.0052 | 0.1326 | 0.0000 | 0.0013 | 0.0330 | 0.4770 |
|--------|--------|--------|--------|--------|--------|--------|--------|--------|--------|--------|

CORR =

|         |         |         |         |         |         |         |         |         |        |        |
|---------|---------|---------|---------|---------|---------|---------|---------|---------|--------|--------|
| 1.0000  | -0.1839 | 0.1143  | -0.1542 | 0.0441  | -0.1225 | 0.0558  | -0.5484 | 0.0286  | 0      | 0      |
| -0.1839 | 1.0000  | -0.5192 | -0.0346 | 0.0625  | 0.2653  | -0.3350 | 0.0475  | -0.3278 | 0      | 0      |
| 0.1143  | -0.5192 | 1.0000  | 0.1729  | -0.2036 | -0.0400 | 0.4143  | -0.0432 | 0.3408  | 0      | 0      |
| -0.1542 | -0.0346 | 0.1729  | 1.0000  | -0.9887 | -0.4811 | 0.0517  | -0.0340 | 0.1413  | 0      | 0      |
| 0.0441  | 0.0625  | -0.2036 | -0.9887 | 1.0000  | 0.5586  | -0.0819 | 0.1173  | -0.1665 | 0      | 0      |
| -0.1225 | 0.2653  | -0.0400 | -0.4811 | 0.5586  | 1.0000  | -0.2404 | -0.0114 | -0.3253 | 0      | 0      |
| 0.0558  | -0.3350 | 0.4143  | 0.0517  | -0.0819 | -0.2404 | 1.0000  | 0.4611  | 0.9798  | 0      | 0      |
| -0.5484 | 0.0475  | -0.0432 | -0.0340 | 0.1173  | -0.0114 | 0.4611  | 1.0000  | 0.5372  | 0      | 0      |
| 0.0286  | -0.3278 | 0.3408  | 0.1413  | -0.1665 | -0.3253 | 0.9798  | 0.5372  | 1.0000  | 0      | 0      |
| 0       | 0       | 0       | 0       | 0       | 0       | 0       | 0       | 0       | 1.0000 | 0      |
| 0       | 0       | 0       | 0       | 0       | 0       | 0       | 0       | 0       | 0      | 1.0000 |

jj =10

theta =

|        |        |        |         |        |        |        |        |        |        |        |
|--------|--------|--------|---------|--------|--------|--------|--------|--------|--------|--------|
| 0.1008 | 0.1250 | 0.5213 | -3.6972 | 6.6931 | 0.0693 | 4.9042 | 0.0856 | 0.3894 | 0.0714 | 8.5949 |
|--------|--------|--------|---------|--------|--------|--------|--------|--------|--------|--------|

SE =

|        |        |        |        |        |        |        |        |        |        |        |
|--------|--------|--------|--------|--------|--------|--------|--------|--------|--------|--------|
| 0.0058 | 0.1397 | 0.0224 | 0.0865 | 0.4664 | 0.0066 | 2.1645 | 0.1877 | 0.0963 | 0.0493 | 0.5407 |
|--------|--------|--------|--------|--------|--------|--------|--------|--------|--------|--------|

CORR =

|         |         |         |         |         |         |         |         |         |        |        |
|---------|---------|---------|---------|---------|---------|---------|---------|---------|--------|--------|
| 1.0000  | -0.0620 | 0.2737  | -0.4102 | 0.1485  | 0.0335  | -0.1854 | 0.1904  | 0.2024  | 0      | 0      |
| -0.0620 | 1.0000  | -0.4018 | -0.1481 | 0.2043  | 0.4814  | 0.1181  | -0.1144 | -0.1115 | 0      | 0      |
| 0.2737  | -0.4018 | 1.0000  | -0.3730 | 0.1320  | 0.0147  | -0.2820 | 0.2889  | 0.2997  | 0      | 0      |
| -0.4102 | -0.1481 | -0.3730 | 1.0000  | -0.8557 | -0.2094 | 0.7776  | -0.7861 | -0.7943 | 0      | 0      |
| 0.1485  | 0.2043  | 0.1320  | -0.8557 | 1.0000  | 0.5080  | -0.7064 | 0.7116  | 0.7114  | 0      | 0      |
| 0.0335  | 0.4814  | 0.0147  | -0.2094 | 0.5080  | 1.0000  | 0.0544  | -0.0493 | -0.0455 | 0      | 0      |
| -0.1854 | 0.1181  | -0.2820 | 0.7776  | -0.7064 | 0.0544  | 1.0000  | -0.9998 | -0.9990 | 0      | 0      |
| 0.1904  | -0.1144 | 0.2889  | -0.7861 | 0.7116  | -0.0493 | -0.9998 | 1.0000  | 0.9996  | 0      | 0      |
| 0.2024  | -0.1115 | 0.2997  | -0.7943 | 0.7114  | -0.0455 | -0.9990 | 0.9996  | 1.0000  | 0      | 0      |
| 0       | 0       | 0       | 0       | 0       | 0       | 0       | 0       | 0       | 1.0000 | 0      |
| 0       | 0       | 0       | 0       | 0       | 0       | 0       | 0       | 0       | 0      | 1.0000 |

jj =11

theta =

0.0075 -0.0031 0.2295 -2.7867 1.8360 0.0307 23.9960 0.0000 0.2122 0.0232 6.5030  
 SE =  
 0.0021 0.0982 0.0163 0.0358 0.1107 0.0061 0.3361 0.0001 0.0011 0.0281 0.4704

CORR =  
 1.0000 -0.2052 0.1477 -0.1425 -0.3927 -0.0087 -0.0002 -0.4459 -0.0134 0 0  
 -0.2052 1.0000 -0.6756 -0.2131 0.0516 -0.3327 0.0042 0.1679 0.0237 0 0  
 0.1477 -0.6756 1.0000 -0.2136 0.1357 0.4024 0.1968 -0.0176 0.1421 0 0  
 -0.1425 -0.2131 -0.2136 1.0000 -0.6376 -0.0556 -0.3734 -0.4832 -0.3397 0 0  
 -0.3927 0.0516 0.1357 -0.6376 1.0000 0.3223 0.3266 0.8571 0.3255 0 0  
 -0.0087 -0.3327 0.4024 -0.0556 0.3223 1.0000 -0.2369 -0.1251 -0.2723 0 0  
 -0.0002 0.0042 0.1968 -0.3734 0.3266 -0.2369 1.0000 0.5619 0.9920 0 0  
 -0.4459 0.1679 -0.0176 -0.4832 0.8571 -0.1251 0.5619 1.0000 0.5921 0 0  
 -0.0134 0.0237 0.1421 -0.3397 0.3255 -0.2723 0.9920 0.5921 1.0000 0 0  
 0 0 0 0 0 0 0 0 0 1.0000 0  
 0 0 0 0 0 0 0 0 0 0 1.0000

jj =12  
 theta =  
 0.0692 -0.6399 0.4095 -5.3707 27.7629 0.0991 9.1565 0.0021 0.2747 0.0614 15.5325  
 SE =  
 0.0046 0.1276 0.0167 0.0855 2.9311 0.0032 0.0455 0.0002 0.0014 0.0457 0.7269

CORR =  
 1.0000 -0.0120 0.0748 0.0951 -0.3274 -0.2361 0.2801 -0.3530 -0.0285 0 0  
 -0.0120 1.0000 -0.7197 -0.2951 0.2002 -0.0114 0.0017 -0.0189 -0.0537 0 0  
 0.0748 -0.7197 1.0000 0.1715 -0.1858 0.1281 0.2771 0.0001 0.1792 0 0  
 0.0951 -0.2951 0.1715 1.0000 -0.9128 -0.3978 -0.2904 -0.6655 -0.6080 0 0  
 -0.3274 0.2002 -0.1858 -0.9128 1.0000 0.6292 0.0279 0.6834 0.4267 0 0  
 -0.2361 -0.0114 0.1281 -0.3978 0.6292 1.0000 -0.0713 0.1024 -0.0906 0 0  
 0.2801 0.0017 0.2771 -0.2904 0.0279 -0.0713 1.0000 0.0222 0.5974 0 0  
 -0.3530 -0.0189 0.0001 -0.6655 0.6834 0.1024 0.0222 1.0000 0.7842 0 0  
 -0.0285 -0.0537 0.1792 -0.6080 0.4267 -0.0906 0.5974 0.7842 1.0000 0 0  
 0 0 0 0 0 0 0 0 0 1.0000 0  
 0 0 0 0 0 0 0 0 0 0 1.0000

jj =13  
 theta =  
 0.0130 0.0004 0.3325 -3.0610 3.7131 0.0633 12.1303 0.0001 0.2425 0.0446 7.1757  
 SE =  
 0.0048 0.1146 0.0172 0.0705 0.2537 0.0053 0.2199 0.0001 0.0022 0.0390 0.4941

CORR =  
 1.0000 -0.1690 0.2090 -0.1860 -0.1919 0.0738 0.0309 -0.4349 -0.0147 0 0  
 -0.1690 1.0000 -0.3901 -0.3415 0.1810 -0.1782 0.2609 0.2952 0.2417 0 0  
 0.2090 -0.3901 1.0000 -0.3531 0.2899 0.4969 0.2421 -0.0678 0.1192 0 0  
 -0.1860 -0.3415 -0.3531 1.0000 -0.8017 -0.2773 -0.6282 -0.4424 -0.5062 0 0  
 -0.1919 0.1810 0.2899 -0.8017 1.0000 0.5819 0.4778 0.6366 0.4081 0 0  
 0.0738 -0.1782 0.4969 -0.2773 0.5819 1.0000 0.0788 0.0337 0.0160 0 0  
 0.0309 0.2609 0.2421 -0.6282 0.4778 0.0788 1.0000 0.6508 0.9663 0 0



|         |        |         |         |        |        |        |        |        |        |        |
|---------|--------|---------|---------|--------|--------|--------|--------|--------|--------|--------|
| -0.4349 | 0.2952 | -0.0678 | -0.4424 | 0.6366 | 0.0337 | 0.6508 | 1.0000 | 0.7386 | 0      | 0      |
| -0.0147 | 0.2417 | 0.1192  | -0.5062 | 0.4081 | 0.0160 | 0.9663 | 0.7386 | 1.0000 | 0      | 0      |
| 0       | 0      | 0       | 0       | 0      | 0      | 0      | 0      | 0      | 1.0000 | 0      |
| 0       | 0      | 0       | 0       | 0      | 0      | 0      | 0      | 0      | 0      | 1.0000 |

jj =14

theta =

|        |         |        |         |         |        |         |        |        |        |         |
|--------|---------|--------|---------|---------|--------|---------|--------|--------|--------|---------|
| 0.0595 | -3.6323 | 0.9472 | -4.8564 | 11.8682 | 0.0869 | 13.6945 | 0.0000 | 0.2120 | 0.0454 | 16.1403 |
|--------|---------|--------|---------|---------|--------|---------|--------|--------|--------|---------|

SE =

|        |        |        |        |        |        |        |        |        |        |        |
|--------|--------|--------|--------|--------|--------|--------|--------|--------|--------|--------|
| 0.0045 | 0.1563 | 0.0231 | 0.0569 | 2.0885 | 0.0030 | 0.1171 | 0.0002 | 0.0009 | 0.0393 | 0.7410 |
|--------|--------|--------|--------|--------|--------|--------|--------|--------|--------|--------|

CORR =

|         |         |         |         |         |         |         |         |         |        |        |
|---------|---------|---------|---------|---------|---------|---------|---------|---------|--------|--------|
| 1.0000  | -0.1613 | 0.1588  | 0.0045  | -0.6968 | 0.1374  | -0.0813 | -0.7295 | -0.1262 | 0      | 0      |
| -0.1613 | 1.0000  | -0.5504 | -0.2284 | 0.2388  | -0.1415 | 0.1174  | 0.2789  | 0.1667  | 0      | 0      |
| 0.1588  | -0.5504 | 1.0000  | -0.0825 | -0.1584 | -0.2834 | 0.4000  | -0.0294 | 0.4029  | 0      | 0      |
| 0.0045  | -0.2284 | -0.0825 | 1.0000  | -0.5259 | -0.3582 | -0.6561 | -0.2864 | -0.5696 | 0      | 0      |
| -0.6968 | 0.2388  | -0.1584 | -0.5259 | 1.0000  | 0.0692  | 0.3515  | 0.9063  | 0.3714  | 0      | 0      |
| 0.1374  | -0.1415 | -0.2834 | -0.3582 | 0.0692  | 1.0000  | -0.1380 | -0.3421 | -0.3237 | 0      | 0      |
| -0.0813 | 0.1174  | 0.4000  | -0.6561 | 0.3515  | -0.1380 | 1.0000  | 0.3595  | 0.9702  | 0      | 0      |
| -0.7295 | 0.2789  | -0.0294 | -0.2864 | 0.9063  | -0.3421 | 0.3595  | 1.0000  | 0.4618  | 0      | 0      |
| -0.1262 | 0.1667  | 0.4029  | -0.5696 | 0.3714  | -0.3237 | 0.9702  | 0.4618  | 1.0000  | 0      | 0      |
| 0       | 0       | 0       | 0       | 0       | 0       | 0       | 0       | 0       | 1.0000 | 0      |
| 0       | 0       | 0       | 0       | 0       | 0       | 0       | 0       | 0       | 0      | 1.0000 |

jj =15

theta =

|        |         |        |         |         |        |        |        |        |        |        |
|--------|---------|--------|---------|---------|--------|--------|--------|--------|--------|--------|
| 0.0457 | -2.0388 | 0.5899 | -3.8134 | 10.7289 | 0.0519 | 9.2440 | 0.0008 | 0.2426 | 0.0541 | 8.7747 |
|--------|---------|--------|---------|---------|--------|--------|--------|--------|--------|--------|

SE =

|        |        |        |        |        |        |        |        |        |        |        |
|--------|--------|--------|--------|--------|--------|--------|--------|--------|--------|--------|
| 0.0059 | 0.1338 | 0.0216 | 0.1240 | 1.5211 | 0.0048 | 0.1046 | 0.0001 | 0.0022 | 0.0429 | 0.5464 |
|--------|--------|--------|--------|--------|--------|--------|--------|--------|--------|--------|

CORR =

|         |         |         |         |         |         |         |         |         |        |        |
|---------|---------|---------|---------|---------|---------|---------|---------|---------|--------|--------|
| 1.0000  | -0.1597 | 0.1297  | 0.0981  | -0.2827 | -0.4004 | 0.0731  | -0.3393 | -0.0085 | 0      | 0      |
| -0.1597 | 1.0000  | -0.7375 | 0.0886  | -0.0827 | 0.0509  | 0.0703  | 0.1101  | 0.1250  | 0      | 0      |
| 0.1297  | -0.7375 | 1.0000  | -0.2756 | 0.1940  | 0.1043  | 0.3760  | 0.1204  | 0.2605  | 0      | 0      |
| 0.0981  | 0.0886  | -0.2756 | 1.0000  | -0.9650 | -0.7592 | -0.4132 | -0.4142 | -0.2690 | 0      | 0      |
| -0.2827 | -0.0827 | 0.1940  | -0.9650 | 1.0000  | 0.8675  | 0.2720  | 0.4252  | 0.1605  | 0      | 0      |
| -0.4004 | 0.0509  | 0.1043  | -0.7592 | 0.8675  | 1.0000  | 0.1236  | 0.2706  | 0.0025  | 0      | 0      |
| 0.0731  | 0.0703  | 0.3760  | -0.4132 | 0.2720  | 0.1236  | 1.0000  | 0.5531  | 0.8951  | 0      | 0      |
| -0.3393 | 0.1101  | 0.1204  | -0.4142 | 0.4252  | 0.2706  | 0.5531  | 1.0000  | 0.8020  | 0      | 0      |
| -0.0085 | 0.1250  | 0.2605  | -0.2690 | 0.1605  | 0.0025  | 0.8951  | 0.8020  | 1.0000  | 0      | 0      |
| 0       | 0       | 0       | 0       | 0       | 0       | 0       | 0       | 0       | 1.0000 | 0      |
| 0       | 0       | 0       | 0       | 0       | 0       | 0       | 0       | 0       | 0      | 1.0000 |

jj =16

theta =

|        |         |        |         |         |        |        |        |        |        |        |
|--------|---------|--------|---------|---------|--------|--------|--------|--------|--------|--------|
| 0.0290 | -1.0553 | 0.4722 | -5.7606 | 26.7685 | 0.0412 | 7.5408 | 0.0104 | 0.3162 | 0.0365 | 8.5280 |
|--------|---------|--------|---------|---------|--------|--------|--------|--------|--------|--------|

SE =

|        |        |        |        |         |        |        |        |        |        |        |
|--------|--------|--------|--------|---------|--------|--------|--------|--------|--------|--------|
| 0.0031 | 0.1581 | 0.0237 | 1.0274 | 27.7840 | 0.0079 | 0.1383 | 0.0019 | 0.0054 | 0.0352 | 0.5386 |
|--------|--------|--------|--------|---------|--------|--------|--------|--------|--------|--------|

CORR =

|        |         |        |         |        |         |        |         |         |   |   |
|--------|---------|--------|---------|--------|---------|--------|---------|---------|---|---|
| 1.0000 | -0.0474 | 0.0658 | -0.1124 | 0.0873 | -0.1729 | 0.3345 | -0.2287 | -0.0956 | 0 | 0 |
|--------|---------|--------|---------|--------|---------|--------|---------|---------|---|---|

|         |         |         |         |         |         |         |         |         |        |        |
|---------|---------|---------|---------|---------|---------|---------|---------|---------|--------|--------|
| -0.0474 | 1.0000  | -0.6333 | -0.0765 | 0.0630  | -0.1260 | -0.2423 | 0.3046  | 0.3320  | 0      | 0      |
| 0.0658  | -0.6333 | 1.0000  | 0.1375  | -0.1388 | 0.1526  | 0.1642  | -0.1058 | -0.0706 | 0      | 0      |
| -0.1124 | -0.0765 | 0.1375  | 1.0000  | -0.9991 | -0.6772 | 0.0815  | -0.2155 | -0.1432 | 0      | 0      |
| 0.0873  | 0.0630  | -0.1388 | -0.9991 | 1.0000  | 0.6990  | -0.0900 | 0.2144  | 0.1331  | 0      | 0      |
| -0.1729 | -0.1260 | 0.1526  | -0.6772 | 0.6990  | 1.0000  | -0.0728 | 0.0857  | -0.0469 | 0      | 0      |
| 0.3345  | -0.2423 | 0.1642  | 0.0815  | -0.0900 | -0.0728 | 1.0000  | -0.9031 | -0.7331 | 0      | 0      |
| -0.2287 | 0.3046  | -0.1058 | -0.2155 | 0.2144  | 0.0857  | -0.9031 | 1.0000  | 0.9442  | 0      | 0      |
| -0.0956 | 0.3320  | -0.0706 | -0.1432 | 0.1331  | -0.0469 | -0.7331 | 0.9442  | 1.0000  | 0      | 0      |
| 0       | 0       | 0       | 0       | 0       | 0       | 0       | 0       | 0       | 1.0000 | 0      |
| 0       | 0       | 0       | 0       | 0       | 0       | 0       | 0       | 0       | 0      | 1.0000 |

jj =17

theta =

|        |        |        |         |        |        |         |        |        |        |         |
|--------|--------|--------|---------|--------|--------|---------|--------|--------|--------|---------|
| 0.0338 | 4.6374 | 2.2505 | -6.3065 | 8.8341 | 0.0623 | 10.2029 | 0.0001 | 0.2081 | 0.0694 | 11.5448 |
|--------|--------|--------|---------|--------|--------|---------|--------|--------|--------|---------|

SE =

|        |        |        |        |        |        |        |        |        |        |        |
|--------|--------|--------|--------|--------|--------|--------|--------|--------|--------|--------|
| 0.0069 | 0.2346 | 0.0524 | 0.0977 | 2.5980 | 0.0039 | 0.1582 | 0.0003 | 0.0018 | 0.0486 | 0.6267 |
|--------|--------|--------|--------|--------|--------|--------|--------|--------|--------|--------|

CORR =

|         |         |         |         |         |         |         |         |         |        |        |
|---------|---------|---------|---------|---------|---------|---------|---------|---------|--------|--------|
| 1.0000  | 0.0091  | 0.2014  | -0.2375 | -0.6396 | 0.0863  | 0.1266  | -0.6411 | 0.0803  | 0      | 0      |
| 0.0091  | 1.0000  | -0.4412 | -0.1158 | 0.1050  | 0.1191  | -0.0842 | 0.1730  | 0.0385  | 0      | 0      |
| 0.2014  | -0.4412 | 1.0000  | -0.5652 | -0.0093 | -0.2069 | 0.7019  | 0.0254  | 0.6319  | 0      | 0      |
| -0.2375 | -0.1158 | -0.5652 | 1.0000  | -0.3459 | -0.1197 | -0.7253 | -0.3035 | -0.7463 | 0      | 0      |
| -0.6396 | 0.1050  | -0.0093 | -0.3459 | 1.0000  | 0.0763  | 0.2023  | 0.9787  | 0.3245  | 0      | 0      |
| 0.0863  | 0.1191  | -0.2069 | -0.1197 | 0.0763  | 1.0000  | 0.1706  | 0.0126  | 0.2019  | 0      | 0      |
| 0.1266  | -0.0842 | 0.7019  | -0.7253 | 0.2023  | 0.1706  | 1.0000  | 0.2282  | 0.9681  | 0      | 0      |
| -0.6411 | 0.1730  | 0.0254  | -0.3035 | 0.9787  | 0.0126  | 0.2282  | 1.0000  | 0.3727  | 0      | 0      |
| 0.0803  | 0.0385  | 0.6319  | -0.7463 | 0.3245  | 0.2019  | 0.9681  | 0.3727  | 1.0000  | 0      | 0      |
| 0       | 0       | 0       | 0       | 0       | 0       | 0       | 0       | 0       | 1.0000 | 0      |
| 0       | 0       | 0       | 0       | 0       | 0       | 0       | 0       | 0       | 0      | 1.0000 |

jj =18

theta =

|        |         |         |         |         |        |         |        |        |        |         |
|--------|---------|---------|---------|---------|--------|---------|--------|--------|--------|---------|
| 0.2112 | -0.5479 | -0.0967 | -4.5138 | 15.1788 | 0.0821 | 10.4690 | 0.0003 | 0.2358 | 0.0935 | 17.6862 |
|--------|---------|---------|---------|---------|--------|---------|--------|--------|--------|---------|

SE =

|        |        |        |        |        |        |        |        |        |        |        |
|--------|--------|--------|--------|--------|--------|--------|--------|--------|--------|--------|
| 0.0075 | 0.1930 | 0.0279 | 0.0600 | 1.0778 | 0.0027 | 0.0943 | 0.0001 | 0.0014 | 0.0564 | 0.7757 |
|--------|--------|--------|--------|--------|--------|--------|--------|--------|--------|--------|

CORR =

|         |         |         |         |         |         |         |         |         |        |        |
|---------|---------|---------|---------|---------|---------|---------|---------|---------|--------|--------|
| 1.0000  | -0.1231 | 0.1763  | -0.1102 | -0.3345 | -0.1811 | 0.1433  | -0.3433 | 0.0707  | 0      | 0      |
| -0.1231 | 1.0000  | -0.6345 | -0.3156 | 0.1282  | -0.1645 | 0.1745  | 0.1749  | 0.1753  | 0      | 0      |
| 0.1763  | -0.6345 | 1.0000  | -0.1934 | 0.0569  | 0.3616  | 0.2751  | -0.0363 | 0.2166  | 0      | 0      |
| -0.1102 | -0.3156 | -0.1934 | 1.0000  | -0.7195 | -0.2585 | -0.8271 | -0.6813 | -0.8642 | 0      | 0      |
| -0.3345 | 0.1282  | 0.0569  | -0.7195 | 1.0000  | 0.6123  | 0.4893  | 0.8843  | 0.5946  | 0      | 0      |
| -0.1811 | -0.1645 | 0.3616  | -0.2585 | 0.6123  | 1.0000  | 0.1819  | 0.2601  | 0.1224  | 0      | 0      |
| 0.1433  | 0.1745  | 0.2751  | -0.8271 | 0.4893  | 0.1819  | 1.0000  | 0.4622  | 0.9262  | 0      | 0      |
| -0.3433 | 0.1749  | -0.0363 | -0.6813 | 0.8843  | 0.2601  | 0.4622  | 1.0000  | 0.6906  | 0      | 0      |
| 0.0707  | 0.1753  | 0.2166  | -0.8642 | 0.5946  | 0.1224  | 0.9262  | 0.6906  | 1.0000  | 0      | 0      |
| 0       | 0       | 0       | 0       | 0       | 0       | 0       | 0       | 0       | 1.0000 | 0      |
| 0       | 0       | 0       | 0       | 0       | 0       | 0       | 0       | 0       | 0      | 1.0000 |

jj =19

theta =  
 0.0464 1.5044 0.1490 -4.6277 12.7079 0.1006 13.5103 0.0000 0.2287 0.0840 9.3103  
 SE =  
 0.0073 0.1297 0.0185 0.0910 1.8421 0.0054 0.2529 0.0001 0.0019 0.0535 0.5628  
 CORR =  
 1.0000 -0.1574 0.1159 -0.1377 -0.4732 -0.1689 0.0968 -0.5587 0.0943 0 0  
 -0.1574 1.0000 -0.0540 -0.3966 0.3144 0.1501 0.1455 0.2738 0.0973 0 0  
 0.1159 -0.0540 1.0000 0.0078 -0.1997 0.0831 0.2979 -0.0617 0.2609 0 0  
 -0.1377 -0.3966 0.0078 1.0000 -0.6363 -0.1672 -0.5464 -0.3090 -0.4746 0 0  
 -0.4732 0.3144 -0.1997 -0.6363 1.0000 0.3816 0.3134 0.8445 0.3067 0 0  
 -0.1689 0.1501 0.0831 -0.1672 0.3816 1.0000 -0.0172 0.1306 -0.0337 0 0  
 0.0968 0.1455 0.2979 -0.5464 0.3134 -0.0172 1.0000 0.3667 0.9790 0 0  
 -0.5587 0.2738 -0.0617 -0.3090 0.8445 0.1306 0.3667 1.0000 0.4269 0 0  
 0.0943 0.0973 0.2609 -0.4746 0.3067 -0.0337 0.9790 0.4269 1.0000 0 0  
 0 0 0 0 0 0 0 0 0 1.0000 0  
 0 0 0 0 0 0 0 0 0 0 1.0000

jj = 20  
 theta =  
 0.0610 -0.9851 -0.2054 -4.3506 3.5427 0.0360 6.6388 0.0160 0.3072 0.0268 15.5850  
 SE =  
 0.0018 0.2227 0.0265 0.0490 0.1906 0.0020 0.3272 0.0059 0.0087 0.0302 0.7282  
 CORR =  
 1.0000 -0.2863 0.3177 -0.2168 -0.0504 -0.0911 0.0486 -0.0209 0.0266 0 0  
 -0.2863 1.0000 -0.6742 0.0777 -0.1094 -0.0995 0.1382 -0.1508 -0.1774 0 0  
 0.3177 -0.6742 1.0000 -0.1573 -0.0814 0.0710 0.0284 -0.0100 0.0180 0 0  
 -0.2168 0.0777 -0.1573 1.0000 -0.8462 -0.6891 0.7988 -0.8351 -0.8585 0 0  
 -0.0504 -0.1094 -0.0814 -0.8462 1.0000 0.8720 -0.9263 0.9335 0.9092 0 0  
 -0.0911 -0.0995 0.0710 -0.6891 0.8720 1.0000 -0.7569 0.7583 0.7257 0 0  
 0.0486 0.1382 0.0284 0.7988 -0.9263 -0.7569 1.0000 -0.9951 -0.9740 0 0  
 -0.0209 -0.1508 -0.0100 -0.8351 0.9335 0.7583 -0.9951 1.0000 0.9905 0 0  
 0.0266 -0.1774 0.0180 -0.8585 0.9092 0.7257 -0.9740 0.9905 1.0000 0 0  
 0 0 0 0 0 0 0 0 0 1.0000 0  
 0 0 0 0 0 0 0 0 0 0 1.0000

jj = 21  
 theta =  
 0.1308 -8.8173 2.3410 -6.9763 9.2667 0.1019 24.6712 0.0000 0.1751 0.0694 22.8695  
 SE =  
 0.0063 0.1907 0.0309 0.0773 26.4614 0.0066 0.1520 0.0029 0.0004 0.0486 0.8821  
 CORR =  
 1.0000 -0.3263 0.1737 0.0349 -0.7492 0.1387 -0.0378 -0.7506 -0.0639 0 0  
 -0.3263 1.0000 -0.5194 0.0343 0.3321 -0.4042 -0.1583 0.3425 -0.0844 0 0  
 0.1737 -0.5194 1.0000 -0.6025 -0.0249 -0.0290 0.5974 -0.0294 0.5885 0 0  
 0.0349 0.0343 -0.6025 1.0000 -0.3811 0.0758 -0.7766 -0.3722 -0.7907 0 0  
 -0.7492 0.3321 -0.0249 -0.3811 1.0000 -0.2122 0.2412 0.9997 0.2958 0 0  
 0.1387 -0.4042 -0.0290 0.0758 -0.2122 1.0000 -0.1311 -0.2314 -0.1960 0 0  
 -0.0378 -0.1583 0.5974 -0.7766 0.2412 -0.1311 1.0000 0.2357 0.9813 0 0

|         |         |         |         |        |         |        |        |        |        |        |
|---------|---------|---------|---------|--------|---------|--------|--------|--------|--------|--------|
| -0.7506 | 0.3425  | -0.0294 | -0.3722 | 0.9997 | -0.2314 | 0.2357 | 1.0000 | 0.2924 | 0      | 0      |
| -0.0639 | -0.0844 | 0.5885  | -0.7907 | 0.2958 | -0.1960 | 0.9813 | 0.2924 | 1.0000 | 0      | 0      |
| 0       | 0       | 0       | 0       | 0      | 0       | 0      | 0      | 0      | 1.0000 | 0      |
| 0       | 0       | 0       | 0       | 0      | 0       | 0      | 0      | 0      | 0      | 1.0000 |

jj =22  
theta =  
-0.0012 2.4051 0.0010 -5.0105 26.2404 0.0661 7.4186 0.0070 0.2991 0.0810 9.4089  
SE =  
0.0065 0.1394 0.0228 0.1168 3.7691 0.0039 0.1974 0.0021 0.0069 0.0525 0.5658  
CORR =  
1.0000 -0.2156 0.2858 0.2530 -0.4072 -0.0944 0.4375 -0.3579 -0.2278 0 0  
-0.2156 1.0000 -0.6699 -0.2866 0.2103 -0.1379 -0.3991 0.3670 0.3345 0 0  
0.2858 -0.6699 1.0000 0.1095 -0.1517 0.3864 0.4279 -0.2452 -0.1113 0 0  
0.2530 -0.2866 0.1095 1.0000 -0.9528 -0.5235 0.7138 -0.7845 -0.7436 0 0  
-0.4072 0.2103 -0.1517 -0.9528 1.0000 0.6154 -0.6989 0.7134 0.6165 0 0  
-0.0944 -0.1379 0.3864 -0.5235 0.6154 1.0000 0.0153 0.0605 0.0493 0 0  
0.4375 -0.3991 0.4279 0.7138 -0.6989 0.0153 1.0000 -0.9485 -0.8437 0 0  
-0.3579 0.3670 -0.2452 -0.7845 0.7134 0.0605 -0.9485 1.0000 0.9669 0 0  
-0.2278 0.3345 -0.1113 -0.7436 0.6165 0.0493 -0.8437 0.9669 1.0000 0 0  
0 0 0 0 0 0 0 0 0 1.0000 0  
0 0 0 0 0 0 0 0 0 0 1.0000

jj =23  
theta =  
0.0132 0.1406 0.1029 -3.4429 5.6734 0.0741 10.7702 0.0007 0.2657 0.0514 10.4807  
SE =  
0.0044 0.1716 0.0273 0.0752 0.4489 0.0018 0.1231 0.0001 0.0024 0.0418 0.5971  
CORR =  
1.0000 -0.0875 0.1366 -0.0466 -0.3537 -0.1160 0.1657 -0.3636 0.0007 0 0  
-0.0875 1.0000 -0.4932 -0.2446 0.0812 0.0462 0.1022 0.1038 0.1184 0 0  
0.1366 -0.4932 1.0000 -0.1011 -0.0431 0.2590 0.0733 -0.2762 -0.1841 0 0  
-0.0466 -0.2446 -0.1011 1.0000 -0.7958 -0.3105 -0.6949 -0.6875 -0.7335 0 0  
-0.3537 0.0812 -0.0431 -0.7958 1.0000 0.5248 0.4151 0.8940 0.6186 0 0  
-0.1160 0.0462 0.2590 -0.3105 0.5248 1.0000 0.0767 0.2596 0.0758 0 0  
0.1657 0.1022 0.0733 -0.6949 0.4151 0.0767 1.0000 0.4754 0.8822 0 0  
-0.3636 0.1038 -0.2762 -0.6875 0.8940 0.2596 0.4754 1.0000 0.7864 0 0  
0.0007 0.1184 -0.1841 -0.7335 0.6186 0.0758 0.8822 0.7864 1.0000 0 0  
0 0 0 0 0 0 0 0 0 1.0000 0  
0 0 0 0 0 0 0 0 0 0 1.0000

jj =24  
theta =  
0.0316 -0.0929 0.4591 -5.1178 20.3331 0.0870 12.7727 0.0000 0.2075 0.0576 13.2217  
SE =  
0.0057 0.1212 0.0183 0.0564 3.4995 0.0019 0.1390 0.0002 0.0011 0.0443 0.6707  
CORR =  
1.0000 -0.0640 0.1068 -0.0455 -0.6712 0.0291 -0.0033 -0.6671 -0.0296 0 0  
-0.0640 1.0000 -0.3682 -0.1357 0.1038 -0.1699 0.1318 0.1747 0.1677 0 0

|         |         |         |         |         |         |         |         |         |        |        |
|---------|---------|---------|---------|---------|---------|---------|---------|---------|--------|--------|
| 0.1068  | -0.3682 | 1.0000  | -0.5571 | 0.1593  | -0.3137 | 0.6503  | 0.1847  | 0.6130  | 0      | 0      |
| -0.0455 | -0.1357 | -0.5571 | 1.0000  | -0.5306 | 0.1608  | -0.7737 | -0.4681 | -0.7608 | 0      | 0      |
| -0.6712 | 0.1038  | 0.1593  | -0.5306 | 1.0000  | -0.1084 | 0.4181  | 0.9684  | 0.4629  | 0      | 0      |
| 0.0291  | -0.1699 | -0.3137 | 0.1608  | -0.1084 | 1.0000  | -0.3825 | -0.3063 | -0.4527 | 0      | 0      |
| -0.0033 | 0.1318  | 0.6503  | -0.7737 | 0.4181  | -0.3825 | 1.0000  | 0.4659  | 0.9866  | 0      | 0      |
| -0.6671 | 0.1747  | 0.1847  | -0.4681 | 0.9684  | -0.3063 | 0.4659  | 1.0000  | 0.5336  | 0      | 0      |
| -0.0296 | 0.1677  | 0.6130  | -0.7608 | 0.4629  | -0.4527 | 0.9866  | 0.5336  | 1.0000  | 0      | 0      |
| 0       | 0       | 0       | 0       | 0       | 0       | 0       | 0       | 0       | 1.0000 | 0      |
| 0       | 0       | 0       | 0       | 0       | 0       | 0       | 0       | 0       | 0      | 1.0000 |

**LH on Te – For EACH INDIVIDUAL - based on the parameter est for that INDIVIDUAL’S parameter - Est of Asymptotic Covariance Matrix ( based on Observed Information Matrix)**

Te-Fast    -slow    basal    Pot    Sens    Eff    sd RE    sd Error

jj = 1

theta =

|        |        |        |         |        |        |        |         |
|--------|--------|--------|---------|--------|--------|--------|---------|
| 0.7645 | 0.2276 | 0.0000 | -3.1201 | 1.3393 | 4.6159 | 0.6774 | 76.9945 |
|--------|--------|--------|---------|--------|--------|--------|---------|

SE =

|        |        |        |        |        |        |        |        |
|--------|--------|--------|--------|--------|--------|--------|--------|
| 0.1361 | 0.0333 | 0.5560 | 0.9647 | 0.2928 | 1.0995 | 1.6185 | 0.1518 |
|--------|--------|--------|--------|--------|--------|--------|--------|

CORR =

|         |         |         |         |         |         |        |        |
|---------|---------|---------|---------|---------|---------|--------|--------|
| 1.0000  | 0.7660  | 0.2241  | -0.2780 | 0.2671  | 0.8057  | 0      | 0      |
| 0.7660  | 1.0000  | 0.3216  | -0.4483 | 0.4382  | 0.8096  | 0      | 0      |
| 0.2241  | 0.3216  | 1.0000  | -0.9633 | 0.9349  | 0.7304  | 0      | 0      |
| -0.2780 | -0.4483 | -0.9633 | 1.0000  | -0.9913 | -0.7742 | 0      | 0      |
| 0.2671  | 0.4382  | 0.9349  | -0.9913 | 1.0000  | 0.7562  | 0      | 0      |
| 0.8057  | 0.8096  | 0.7304  | -0.7742 | 0.7562  | 1.0000  | 0      | 0      |
| 0       | 0       | 0       | 0       | 0       | 0       | 1.0000 | 0      |
| 0       | 0       | 0       | 0       | 0       | 0       | 0      | 1.0000 |

jj = 2

theta =

|        |        |        |         |        |        |        |         |
|--------|--------|--------|---------|--------|--------|--------|---------|
| 1.0133 | 0.2756 | 0.0000 | -1.4960 | 1.6114 | 4.3099 | 1.3694 | 43.9822 |
|--------|--------|--------|---------|--------|--------|--------|---------|

SE =

|        |        |        |        |        |        |        |        |
|--------|--------|--------|--------|--------|--------|--------|--------|
| 0.1272 | 0.0291 | 0.5359 | 0.4934 | 0.3740 | 1.0194 | 1.2232 | 0.2158 |
|--------|--------|--------|--------|--------|--------|--------|--------|

CORR =

|         |         |         |         |         |         |   |   |
|---------|---------|---------|---------|---------|---------|---|---|
| 1.0000  | 0.1752  | 0.0674  | 0.0845  | -0.1477 | 0.4488  | 0 | 0 |
| 0.1752  | 1.0000  | 0.4326  | -0.4193 | 0.4642  | 0.7062  | 0 | 0 |
| 0.0674  | 0.4326  | 1.0000  | -0.9726 | 0.8979  | 0.8507  | 0 | 0 |
| 0.0845  | -0.4193 | -0.9726 | 1.0000  | -0.9505 | -0.7797 | 0 | 0 |
| -0.1477 | 0.4642  | 0.8979  | -0.9505 | 1.0000  | 0.7622  | 0 | 0 |

|        |        |        |         |        |        |        |        |
|--------|--------|--------|---------|--------|--------|--------|--------|
| 0.4488 | 0.7062 | 0.8507 | -0.7797 | 0.7622 | 1.0000 | 0      | 0      |
| 0      | 0      | 0      | 0       | 0      | 0      | 1.0000 | 0      |
| 0      | 0      | 0      | 0       | 0      | 0      | 0      | 1.0000 |

jj=3

theta =

|        |        |        |         |        |        |        |         |
|--------|--------|--------|---------|--------|--------|--------|---------|
| 0.9504 | 0.1980 | 0.6519 | -6.5170 | 2.9635 | 2.9628 | 1.0182 | 80.9020 |
|--------|--------|--------|---------|--------|--------|--------|---------|

SE =

|        |        |        |        |        |        |        |        |
|--------|--------|--------|--------|--------|--------|--------|--------|
| 0.0960 | 0.0179 | 0.4540 | 2.2020 | 0.8301 | 0.5632 | 1.6590 | 0.1861 |
|--------|--------|--------|--------|--------|--------|--------|--------|

CORR =

|         |         |         |         |         |         |        |        |
|---------|---------|---------|---------|---------|---------|--------|--------|
| 1.0000  | 0.2056  | 0.0611  | -0.0751 | 0.0883  | 0.5081  | 0      | 0      |
| 0.2056  | 1.0000  | -0.0406 | -0.0321 | -0.0364 | 0.3243  | 0      | 0      |
| 0.0611  | -0.0406 | 1.0000  | -0.8806 | 0.8390  | 0.8410  | 0      | 0      |
| -0.0751 | -0.0321 | -0.8806 | 1.0000  | -0.9908 | -0.7798 | 0      | 0      |
| 0.0883  | -0.0364 | 0.8390  | -0.9908 | 1.0000  | 0.7378  | 0      | 0      |
| 0.5081  | 0.3243  | 0.8410  | -0.7798 | 0.7378  | 1.0000  | 0      | 0      |
| 0       | 0       | 0       | 0       | 0       | 0       | 1.0000 | 0      |
| 0       | 0       | 0       | 0       | 0       | 0       | 0      | 1.0000 |

jj=4

theta =

|        |        |        |         |        |        |        |          |
|--------|--------|--------|---------|--------|--------|--------|----------|
| 0.9872 | 0.1543 | 0.0000 | -1.1908 | 1.8135 | 3.8262 | 1.6425 | 121.0804 |
|--------|--------|--------|---------|--------|--------|--------|----------|

SE =

|        |        |        |        |        |        |        |        |
|--------|--------|--------|--------|--------|--------|--------|--------|
| 0.1116 | 0.0287 | 3.1604 | 2.3030 | 1.2014 | 3.2642 | 2.0296 | 0.2364 |
|--------|--------|--------|--------|--------|--------|--------|--------|

CORR =

|         |         |         |         |         |         |        |        |
|---------|---------|---------|---------|---------|---------|--------|--------|
| 1.0000  | 0.6787  | -0.1088 | 0.1257  | -0.1588 | 0.0660  | 0      | 0      |
| 0.6787  | 1.0000  | -0.2051 | 0.1360  | -0.1052 | -0.0045 | 0      | 0      |
| -0.1088 | -0.2051 | 1.0000  | -0.9815 | 0.8806  | 0.9765  | 0      | 0      |
| 0.1257  | 0.1360  | -0.9815 | 1.0000  | -0.9470 | -0.9730 | 0      | 0      |
| -0.1588 | -0.1052 | 0.8806  | -0.9470 | 1.0000  | 0.8894  | 0      | 0      |
| 0.0660  | -0.0045 | 0.9765  | -0.9730 | 0.8894  | 1.0000  | 0      | 0      |
| 0       | 0       | 0       | 0       | 0       | 0       | 1.0000 | 0      |
| 0       | 0       | 0       | 0       | 0       | 0       | 0      | 1.0000 |

jj=5

theta =

|        |        |        |         |        |        |        |         |
|--------|--------|--------|---------|--------|--------|--------|---------|
| 1.1969 | 0.1064 | 0.0000 | -5.5738 | 4.0235 | 2.8616 | 2.1428 | 94.3381 |
|--------|--------|--------|---------|--------|--------|--------|---------|

SE =

|        |        |        |        |        |        |        |        |
|--------|--------|--------|--------|--------|--------|--------|--------|
| 0.0833 | 0.0112 | 0.2770 | 1.7673 | 1.1702 | 0.4887 | 1.7915 | 0.2700 |
|--------|--------|--------|--------|--------|--------|--------|--------|

CORR =

|         |         |         |         |         |         |        |   |
|---------|---------|---------|---------|---------|---------|--------|---|
| 1.0000  | 0.5970  | 0.2288  | -0.2491 | 0.2334  | 0.6670  | 0      | 0 |
| 0.5970  | 1.0000  | 0.1688  | -0.3866 | 0.3495  | 0.7320  | 0      | 0 |
| 0.2288  | 0.1688  | 1.0000  | -0.7905 | 0.7428  | 0.7519  | 0      | 0 |
| -0.2491 | -0.3866 | -0.7905 | 1.0000  | -0.9915 | -0.7549 | 0      | 0 |
| 0.2334  | 0.3495  | 0.7428  | -0.9915 | 1.0000  | 0.7150  | 0      | 0 |
| 0.6670  | 0.7320  | 0.7519  | -0.7549 | 0.7150  | 1.0000  | 0      | 0 |
| 0       | 0       | 0       | 0       | 0       | 0       | 1.0000 | 0 |

0 0 0 0 0 0 0 1.0000

jj=6

theta =

0.7482 0.1248 0.0000 -1.9799 1.3707 3.1637 1.1830 47.3581

SE =

0.0884 0.0103 0.3739 0.6095 0.3310 0.6297 1.2693 0.2006

CORR =

|         |         |         |         |         |         |        |        |
|---------|---------|---------|---------|---------|---------|--------|--------|
| 1.0000  | 0.6460  | 0.1626  | -0.0838 | -0.1384 | 0.4460  | 0      | 0      |
| 0.6460  | 1.0000  | 0.1524  | -0.1906 | -0.0099 | 0.4362  | 0      | 0      |
| 0.1626  | 0.1524  | 1.0000  | -0.9691 | 0.9048  | 0.9229  | 0      | 0      |
| -0.0838 | -0.1906 | -0.9691 | 1.0000  | -0.9539 | -0.8957 | 0      | 0      |
| -0.1384 | -0.0099 | 0.9048  | -0.9539 | 1.0000  | 0.7971  | 0      | 0      |
| 0.4460  | 0.4362  | 0.9229  | -0.8957 | 0.7971  | 1.0000  | 0      | 0      |
| 0       | 0       | 0       | 0       | 0       | 0       | 1.0000 | 0      |
| 0       | 0       | 0       | 0       | 0       | 0       | 0      | 1.0000 |

jj=7

theta =

1.0583 0.2642 0.0000 -2.2944 1.2564 6.0033 2.0189 71.7690

SE =

0.1235 0.0307 0.8014 0.7432 0.3035 1.4593 1.5626 0.2621

CORR =

|         |         |         |         |         |         |        |        |
|---------|---------|---------|---------|---------|---------|--------|--------|
| 1.0000  | 0.6479  | 0.3145  | -0.2798 | 0.2870  | 0.7151  | 0      | 0      |
| 0.6479  | 1.0000  | 0.2468  | -0.2820 | 0.2596  | 0.6501  | 0      | 0      |
| 0.3145  | 0.2468  | 1.0000  | -0.9588 | 0.8934  | 0.8470  | 0      | 0      |
| -0.2798 | -0.2820 | -0.9588 | 1.0000  | -0.9739 | -0.8390 | 0      | 0      |
| 0.2870  | 0.2596  | 0.8934  | -0.9739 | 1.0000  | 0.8163  | 0      | 0      |
| 0.7151  | 0.6501  | 0.8470  | -0.8390 | 0.8163  | 1.0000  | 0      | 0      |
| 0       | 0       | 0       | 0       | 0       | 0       | 1.0000 | 0      |
| 0       | 0       | 0       | 0       | 0       | 0       | 0      | 1.0000 |

jj=8

theta =

0.5710 0.0954 0.0000 -4.3118 1.8835 2.8834 1.4793 57.7664

SE =

0.0443 0.0057 0.3626 1.2160 0.4479 0.4703 1.4019 0.2243

CORR =

|         |         |         |         |         |         |        |   |
|---------|---------|---------|---------|---------|---------|--------|---|
| 1.0000  | 0.0117  | 0.3956  | -0.1424 | 0.0454  | 0.5601  | 0      | 0 |
| 0.0117  | 1.0000  | 0.0341  | -0.1695 | 0.1887  | 0.2181  | 0      | 0 |
| 0.3956  | 0.0341  | 1.0000  | -0.9004 | 0.8096  | 0.9547  | 0      | 0 |
| -0.1424 | -0.1695 | -0.9004 | 1.0000  | -0.9806 | -0.8610 | 0      | 0 |
| 0.0454  | 0.1887  | 0.8096  | -0.9806 | 1.0000  | 0.7803  | 0      | 0 |
| 0.5601  | 0.2181  | 0.9547  | -0.8610 | 0.7803  | 1.0000  | 0      | 0 |
| 0       | 0       | 0       | 0       | 0       | 0       | 1.0000 | 0 |

0 0 0 0 0 0 0 1.0000

jj=9

theta =

0.6366 0.0809 0.0000 -4.3773 3.5564 1.5888 1.0574 29.8051

SE =

0.0403 0.0095 0.0809 0.7392 0.5871 0.1329 1.0070 0.1897

CORR =

|         |         |         |         |         |         |        |        |
|---------|---------|---------|---------|---------|---------|--------|--------|
| 1.0000  | 0.7019  | -0.1612 | -0.2591 | 0.1876  | 0.6887  | 0      | 0      |
| 0.7019  | 1.0000  | -0.4882 | -0.3935 | 0.3591  | 0.5847  | 0      | 0      |
| -0.1612 | -0.4882 | 1.0000  | -0.4359 | 0.3918  | 0.3768  | 0      | 0      |
| -0.2591 | -0.3935 | -0.4359 | 1.0000  | -0.9877 | -0.8060 | 0      | 0      |
| 0.1876  | 0.3591  | 0.3918  | -0.9877 | 1.0000  | 0.7481  | 0      | 0      |
| 0.6887  | 0.5847  | 0.3768  | -0.8060 | 0.7481  | 1.0000  | 0      | 0      |
| 0       | 0       | 0       | 0       | 0       | 0       | 1.0000 | 0      |
| 0       | 0       | 0       | 0       | 0       | 0       | 0      | 1.0000 |

jj=10

theta =

0.4943 0.1815 0.0171 -2.8359 1.5683 2.0354 0.4394 36.2906

SE =

0.0365 0.0221 0.4035 1.1686 0.4229 0.4157 1.1111 0.1223

CORR =

|         |         |         |         |         |         |        |        |
|---------|---------|---------|---------|---------|---------|--------|--------|
| 1.0000  | -0.0692 | -0.0861 | 0.1123  | -0.1135 | 0.1068  | 0      | 0      |
| -0.0692 | 1.0000  | -0.1966 | 0.1424  | -0.2271 | -0.0380 | 0      | 0      |
| -0.0861 | -0.1966 | 1.0000  | -0.9701 | 0.9297  | 0.9641  | 0      | 0      |
| 0.1123  | 0.1424  | -0.9701 | 1.0000  | -0.9837 | -0.9438 | 0      | 0      |
| -0.1135 | -0.2271 | 0.9297  | -0.9837 | 1.0000  | 0.8943  | 0      | 0      |
| 0.1068  | -0.0380 | 0.9641  | -0.9438 | 0.8943  | 1.0000  | 0      | 0      |
| 0       | 0       | 0       | 0       | 0       | 0       | 1.0000 | 0      |
| 0       | 0       | 0       | 0       | 0       | 0       | 0      | 1.0000 |

jj=11

theta =

0.7661 0.1912 0.0000 -1.4794 2.7734 1.9162 0.4192 22.9671

SE =

0.0645 0.0205 0.4239 0.8446 0.7704 0.5456 0.8839 0.1194

CORR =

|         |         |         |         |         |         |        |   |
|---------|---------|---------|---------|---------|---------|--------|---|
| 1.0000  | 0.5971  | 0.2749  | -0.2643 | 0.1915  | 0.4989  | 0      | 0 |
| 0.5971  | 1.0000  | 0.3201  | -0.3730 | 0.2945  | 0.5363  | 0      | 0 |
| 0.2749  | 0.3201  | 1.0000  | -0.9884 | 0.9326  | 0.9577  | 0      | 0 |
| -0.2643 | -0.3730 | -0.9884 | 1.0000  | -0.9655 | -0.9593 | 0      | 0 |
| 0.1915  | 0.2945  | 0.9326  | -0.9655 | 1.0000  | 0.9040  | 0      | 0 |
| 0.4989  | 0.5363  | 0.9577  | -0.9593 | 0.9040  | 1.0000  | 0      | 0 |
| 0       | 0       | 0       | 0       | 0       | 0       | 1.0000 | 0 |



0 0 0 0 0 0 0 1.0000

jj =12

theta =

0.7317 0.0753 0.0000 -5.3952 3.9351 2.2518 0.7835 41.8905

SE =

0.0620 0.0070 0.0886 1.4150 0.9755 0.2292 1.1938 0.1633

CORR =

|         |         |         |         |         |         |        |        |
|---------|---------|---------|---------|---------|---------|--------|--------|
| 1.0000  | 0.6920  | 0.0090  | -0.0329 | 0.0074  | 0.7436  | 0      | 0      |
| 0.6920  | 1.0000  | 0.0239  | -0.2141 | 0.1798  | 0.8117  | 0      | 0      |
| 0.0090  | 0.0239  | 1.0000  | -0.8511 | 0.8202  | 0.5086  | 0      | 0      |
| -0.0329 | -0.2141 | -0.8511 | 1.0000  | -0.9928 | -0.5869 | 0      | 0      |
| 0.0074  | 0.1798  | 0.8202  | -0.9928 | 1.0000  | 0.5591  | 0      | 0      |
| 0.7436  | 0.8117  | 0.5086  | -0.5869 | 0.5591  | 1.0000  | 0      | 0      |
| 0       | 0       | 0       | 0       | 0       | 0       | 1.0000 | 0      |
| 0       | 0       | 0       | 0       | 0       | 0       | 0      | 1.0000 |

jj =13

theta =

0.8292 0.1436 0.1221 -5.0047 3.5786 2.4212 0.9066 63.1354

SE =

0.0827 0.0210 0.2204 1.6649 1.0405 0.3383 1.4656 0.1756

CORR =

|         |         |         |         |         |         |        |        |
|---------|---------|---------|---------|---------|---------|--------|--------|
| 1.0000  | 0.6887  | -0.1126 | -0.3245 | 0.3207  | 0.7174  | 0      | 0      |
| 0.6887  | 1.0000  | -0.4075 | -0.2805 | 0.2624  | 0.4972  | 0      | 0      |
| -0.1126 | -0.4075 | 1.0000  | -0.6799 | 0.6656  | 0.5169  | 0      | 0      |
| -0.3245 | -0.2805 | -0.6799 | 1.0000  | -0.9949 | -0.8401 | 0      | 0      |
| 0.3207  | 0.2624  | 0.6656  | -0.9949 | 1.0000  | 0.8302  | 0      | 0      |
| 0.7174  | 0.4972  | 0.5169  | -0.8401 | 0.8302  | 1.0000  | 0      | 0      |
| 0       | 0       | 0       | 0       | 0       | 0       | 1.0000 | 0      |
| 0       | 0       | 0       | 0       | 0       | 0       | 0      | 1.0000 |

jj =14

theta =

1.5105 0.2475 0.0000 -2.6603 1.8751 9.6483 2.0225 52.2829

SE =

0.1088 0.0172 0.4463 0.4252 0.2546 0.9005 1.3337 0.2623

CORR =

|         |         |         |         |         |         |        |   |
|---------|---------|---------|---------|---------|---------|--------|---|
| 1.0000  | 0.7159  | -0.0552 | 0.0263  | -0.0864 | 0.6228  | 0      | 0 |
| 0.7159  | 1.0000  | -0.0343 | -0.0634 | 0.0006  | 0.6842  | 0      | 0 |
| -0.0552 | -0.0343 | 1.0000  | -0.9666 | 0.9213  | 0.6450  | 0      | 0 |
| 0.0263  | -0.0634 | -0.9666 | 1.0000  | -0.9728 | -0.6962 | 0      | 0 |
| -0.0864 | 0.0006  | 0.9213  | -0.9728 | 1.0000  | 0.6525  | 0      | 0 |
| 0.6228  | 0.6842  | 0.6450  | -0.6962 | 0.6525  | 1.0000  | 0      | 0 |
| 0       | 0       | 0       | 0       | 0       | 0       | 1.0000 | 0 |

0 0 0 0 0 0 0 1.0000

jj =15

theta =

0.8872 0.1189 0.0000 -3.9561 1.6750 3.2229 0.1594 31.1054

SE =

0.0768 0.0079 0.1022 0.4505 0.1841 0.2352 1.0287 0.0736

CORR =

|         |         |         |         |         |         |        |        |
|---------|---------|---------|---------|---------|---------|--------|--------|
| 1.0000  | 0.7736  | -0.1597 | 0.0001  | 0.0487  | 0.7639  | 0      | 0      |
| 0.7736  | 1.0000  | -0.2724 | -0.0387 | 0.0931  | 0.6881  | 0      | 0      |
| -0.1597 | -0.2724 | 1.0000  | -0.8632 | 0.7845  | 0.4040  | 0      | 0      |
| 0.0001  | -0.0387 | -0.8632 | 1.0000  | -0.9819 | -0.6018 | 0      | 0      |
| 0.0487  | 0.0931  | 0.7845  | -0.9819 | 1.0000  | 0.6374  | 0      | 0      |
| 0.7639  | 0.6881  | 0.4040  | -0.6018 | 0.6374  | 1.0000  | 0      | 0      |
| 0       | 0       | 0       | 0       | 0       | 0       | 1.0000 | 0      |
| 0       | 0       | 0       | 0       | 0       | 0       | 0      | 1.0000 |

jj =16

theta =

1.0604 0.1212 0.0000 -2.3933 2.5933 2.1968 0.6878 14.5256

SE =

0.0712 0.0052 0.0914 0.2801 0.3189 0.1725 0.7030 0.1530

CORR =

|         |         |         |         |         |         |        |        |
|---------|---------|---------|---------|---------|---------|--------|--------|
| 1.0000  | 0.4375  | -0.3499 | 0.4307  | -0.5072 | -0.0014 | 0      | 0      |
| 0.4375  | 1.0000  | -0.1349 | -0.0298 | 0.0820  | 0.4571  | 0      | 0      |
| -0.3499 | -0.1349 | 1.0000  | -0.9400 | 0.8397  | 0.7589  | 0      | 0      |
| 0.4307  | -0.0298 | -0.9400 | 1.0000  | -0.9574 | -0.8262 | 0      | 0      |
| -0.5072 | 0.0820  | 0.8397  | -0.9574 | 1.0000  | 0.8337  | 0      | 0      |
| -0.0014 | 0.4571  | 0.7589  | -0.8262 | 0.8337  | 1.0000  | 0      | 0      |
| 0       | 0       | 0       | 0       | 0       | 0       | 1.0000 | 0      |
| 0       | 0       | 0       | 0       | 0       | 0       | 0      | 1.0000 |

jj =17

theta =

0.7839 0.1593 0.0000 -2.0537 1.0497 2.1243 1.6831 34.6099

SE =

0.0440 0.0085 0.0912 0.2295 0.1362 0.2661 1.0851 0.2393

CORR =

|         |         |         |         |         |         |        |   |
|---------|---------|---------|---------|---------|---------|--------|---|
| 1.0000  | 0.1735  | 0.2620  | 0.1988  | -0.3144 | 0.4225  | 0      | 0 |
| 0.1735  | 1.0000  | 0.1828  | -0.3441 | 0.1521  | 0.3746  | 0      | 0 |
| 0.2620  | 0.1828  | 1.0000  | -0.7533 | 0.6646  | 0.8835  | 0      | 0 |
| 0.1988  | -0.3441 | -0.7533 | 1.0000  | -0.9192 | -0.6730 | 0      | 0 |
| -0.3144 | 0.1521  | 0.6646  | -0.9192 | 1.0000  | 0.6606  | 0      | 0 |
| 0.4225  | 0.3746  | 0.8835  | -0.6730 | 0.6606  | 1.0000  | 0      | 0 |
| 0       | 0       | 0       | 0       | 0       | 0       | 1.0000 | 0 |

0 0 0 0 0 0 0 1.0000

jj =18

theta =

0.7813 0.1237 0.0000 -4.3598 2.1190 3.1183 1.1579 34.4985

SE =

0.0540 0.0088 0.1777 0.7995 0.3109 0.2893 1.0834 0.1985

CORR =

|         |         |         |         |         |         |        |        |
|---------|---------|---------|---------|---------|---------|--------|--------|
| 1.0000  | 0.7423  | -0.1626 | 0.0907  | -0.1043 | 0.6403  | 0      | 0      |
| 0.7423  | 1.0000  | -0.0150 | -0.1700 | 0.1414  | 0.7408  | 0      | 0      |
| -0.1626 | -0.0150 | 1.0000  | -0.9321 | 0.9075  | 0.5882  | 0      | 0      |
| 0.0907  | -0.1700 | -0.9321 | 1.0000  | -0.9920 | -0.6632 | 0      | 0      |
| -0.1043 | 0.1414  | 0.9075  | -0.9920 | 1.0000  | 0.6386  | 0      | 0      |
| 0.6403  | 0.7408  | 0.5882  | -0.6632 | 0.6386  | 1.0000  | 0      | 0      |
| 0       | 0       | 0       | 0       | 0       | 0       | 1.0000 | 0      |
| 0       | 0       | 0       | 0       | 0       | 0       | 0      | 1.0000 |

jj =19

theta =

0.5435 0.0942 0.0000 -2.4467 0.6351 2.7798 6.3977 20.8543

SE =

0.0586 0.0067 0.0511 0.0824 0.0327 0.3248 0.8423 0.4665

CORR =

|         |         |         |         |         |         |        |        |
|---------|---------|---------|---------|---------|---------|--------|--------|
| 1.0000  | 0.8269  | 0.0054  | -0.9171 | -0.3458 | 0.1674  | 0      | 0      |
| 0.8269  | 1.0000  | -0.1908 | -0.7641 | -0.3492 | 0.1336  | 0      | 0      |
| 0.0054  | -0.1908 | 1.0000  | -0.2854 | 0.8177  | 0.8819  | 0      | 0      |
| -0.9171 | -0.7641 | -0.2854 | 1.0000  | 0.0196  | -0.4217 | 0      | 0      |
| -0.3458 | -0.3492 | 0.8177  | 0.0196  | 1.0000  | 0.8186  | 0      | 0      |
| 0.1674  | 0.1336  | 0.8819  | -0.4217 | 0.8186  | 1.0000  | 0      | 0      |
| 0       | 0       | 0       | 0       | 0       | 0       | 1.0000 | 0      |
| 0       | 0       | 0       | 0       | 0       | 0       | 0      | 1.0000 |

jj =20

theta =

0.7654 0.3125 0.0000 -2.2174 1.8973 3.9343 1.7362 27.9210

SE =

0.0631 0.0360 0.1370 0.2343 0.1972 0.3526 0.9746 0.2430

CORR =

|         |         |         |         |         |         |        |   |
|---------|---------|---------|---------|---------|---------|--------|---|
| 1.0000  | -0.5432 | 0.4178  | -0.1812 | 0.0199  | 0.5288  | 0      | 0 |
| -0.5432 | 1.0000  | 0.0837  | -0.3169 | 0.4315  | 0.3115  | 0      | 0 |
| 0.4178  | 0.0837  | 1.0000  | -0.9071 | 0.7841  | 0.8433  | 0      | 0 |
| -0.1812 | -0.3169 | -0.9071 | 1.0000  | -0.9597 | -0.8001 | 0      | 0 |
| 0.0199  | 0.4315  | 0.7841  | -0.9597 | 1.0000  | 0.7278  | 0      | 0 |
| 0.5288  | 0.3115  | 0.8433  | -0.8001 | 0.7278  | 1.0000  | 0      | 0 |
| 0       | 0       | 0       | 0       | 0       | 0       | 1.0000 | 0 |

0 0 0 0 0 0 0 1.0000

jj =21

theta =

0.3954 0.1037 0.0000 -3.6570 0.8454 7.8345 1.8745 24.3684

SE =

0.0337 0.0102 0.0885 0.3250 0.0950 0.5471 0.9105 0.2525

CORR =

|         |         |         |         |         |         |        |        |
|---------|---------|---------|---------|---------|---------|--------|--------|
| 1.0000  | 0.7264  | 0.5404  | -0.8015 | 0.6632  | 0.6989  | 0      | 0      |
| 0.7264  | 1.0000  | 0.1423  | -0.5551 | 0.3951  | 0.4264  | 0      | 0      |
| 0.5404  | 0.1423  | 1.0000  | -0.8881 | 0.9379  | 0.8619  | 0      | 0      |
| -0.8015 | -0.5551 | -0.8881 | 1.0000  | -0.9634 | -0.8949 | 0      | 0      |
| 0.6632  | 0.3951  | 0.9379  | -0.9634 | 1.0000  | 0.9483  | 0      | 0      |
| 0.6989  | 0.4264  | 0.8619  | -0.8949 | 0.9483  | 1.0000  | 0      | 0      |
| 0       | 0       | 0       | 0       | 0       | 0       | 1.0000 | 0      |
| 0       | 0       | 0       | 0       | 0       | 0       | 0      | 1.0000 |

jj =22

theta =

0.6683 0.2900 0.0000 -1.3838 0.8750 4.2515 1.5084 61.1344

SE =

0.0977 0.0351 0.4869 0.3633 0.1414 0.8397 1.4422 0.2265

CORR =

|         |         |         |         |         |         |        |        |
|---------|---------|---------|---------|---------|---------|--------|--------|
| 1.0000  | -0.5547 | 0.4198  | -0.2178 | 0.0556  | 0.6987  | 0      | 0      |
| -0.5547 | 1.0000  | -0.1768 | 0.0161  | -0.1203 | -0.2298 | 0      | 0      |
| 0.4198  | -0.1768 | 1.0000  | -0.9477 | 0.8256  | 0.9140  | 0      | 0      |
| -0.2178 | 0.0161  | -0.9477 | 1.0000  | -0.9117 | -0.8087 | 0      | 0      |
| 0.0556  | -0.1203 | 0.8256  | -0.9117 | 1.0000  | 0.6664  | 0      | 0      |
| 0.6987  | -0.2298 | 0.9140  | -0.8087 | 0.6664  | 1.0000  | 0      | 0      |
| 0       | 0       | 0       | 0       | 0       | 0       | 1.0000 | 0      |
| 0       | 0       | 0       | 0       | 0       | 0       | 0      | 1.0000 |

jj =23

theta =

0.6362 0.4140 0.0000 -1.4989 1.3308 4.8206 4.5540 95.8391

SE =

0.0938 0.0888 0.5366 0.2755 0.2059 1.0878 1.8057 0.3936

CORR =

|         |         |         |         |         |         |        |   |
|---------|---------|---------|---------|---------|---------|--------|---|
| 1.0000  | -0.7079 | 0.4477  | -0.1647 | 0.0441  | 0.7511  | 0      | 0 |
| -0.7079 | 1.0000  | -0.5552 | 0.3293  | -0.3672 | -0.5296 | 0      | 0 |
| 0.4477  | -0.5552 | 1.0000  | -0.9006 | 0.7921  | 0.8436  | 0      | 0 |
| -0.1647 | 0.3293  | -0.9006 | 1.0000  | -0.9091 | -0.6699 | 0      | 0 |
| 0.0441  | -0.3672 | 0.7921  | -0.9091 | 1.0000  | 0.5739  | 0      | 0 |
| 0.7511  | -0.5296 | 0.8436  | -0.6699 | 0.5739  | 1.0000  | 0      | 0 |
| 0       | 0       | 0       | 0       | 0       | 0       | 1.0000 | 0 |

0 0 0 0 0 0 0 1.0000

jj =24

theta =

0.8284 0.2915 0.0000 -2.6765 2.1797 7.4840 2.6486 82.0063

SE =

0.0868 0.0283 0.6074 0.7551 0.4971 1.0705 1.6703 0.3002

CORR =

1.0000 0.2211 -0.0043 0.1100 -0.1861 0.5292 0 0

0.2211 1.0000 0.1284 -0.1569 0.0199 0.4181 0 0

-0.0043 0.1284 1.0000 -0.9798 0.9376 0.7929 0 0

0.1100 -0.1569 -0.9798 1.0000 -0.9675 -0.7363 0 0

-0.1861 0.0199 0.9376 -0.9675 1.0000 0.6778 0 0

0.5292 0.4181 0.7929 -0.7363 0.6778 1.0000 0 0

0 0 0 0 0 0 1.0000 0

0 0 0 0 0 0 0 1.0000
